# Supplementary material for: t BuOLi-promoted terminal alkyne functionalizations by aliphatic thiols and alcohols
Source: Royal Society of Chemistry journal article supplement (doi:10.1039/d2ob00079b), 2022-01-01
Supplement: d2ob00079b1.pdf [file d2ob00079b1.pdf]

*Supporting Information*

**'BuOLi Promoted Terminal Alkynes Functionalizations by Aliphatic Thiols and Alcohols**

Milan Pramanik<sup>†</sup>, Ashis Mathuri<sup>†</sup> and Prasenjit Mal\*

School of Chemical Sciences, National Institute of Science Education and Research (NISER)  
Bhubaneswar, An OCC of Homi Bhabha National Institute, PO Bhipur-Padanpur, Via Jatni,  
District Khurda, Odisha 752050, India.

\*Corresponding author: Prasenjit Mal, Tel.: +91 9439613856, E-mail: [pmal@niser.ac.in](mailto:pmal@niser.ac.in)

<sup>†</sup>Equal contributing authors.

**Content**

|                                        |        |
|----------------------------------------|--------|
| Optimization and Crystallographic Data | S2-S4  |
| References                             | S4     |
| NMR spectra                            | S4-S35 |

**Table S1.** Optimization of base for **4ab**

| <b>Entry</b> | <b>Base (mol %)</b>       | <b>Yield of 4ab (%)<sup>a</sup></b> |
|--------------|---------------------------|-------------------------------------|
| 1            | <sup>t</sup> BuOLi (10.0) | 51                                  |
| 2            | <sup>t</sup> BuOLi (15.0) | 69                                  |
| 3            | <sup>t</sup> BuOLi (20.0) | 62                                  |

<sup>a</sup>Isolated yields after column chromatography, Standard reaction conditions: **1a** (60 mg, 0.413 mmol), and <sup>t</sup>BuOLi (5 mg, 0.062 mmol) in 1 mL dry EtOH at inert atmosphere for 30 h.

### **Crystallographic Investigation**

The compound **3ad** was recrystallized by the slow evaporation of ethanol and water mixture (ca. 50%). The crystals data were collected with Bruker SMART D8 goniometer equipped with an APEX CCD detector and with an INCOATEC micro source (Cu-K $\alpha$  radiation,  $\lambda = 1.54184 \text{ \AA}$ ). SAINT<sup>+1</sup> and SADABS<sup>2</sup> were used to integrate the intensities and to correct the absorption respectively. The structure was resolved by direct methods and refined on F<sup>2</sup> with SHELXL-97.<sup>3</sup>

### **Compound (3ad) (CCDC 2044668)**

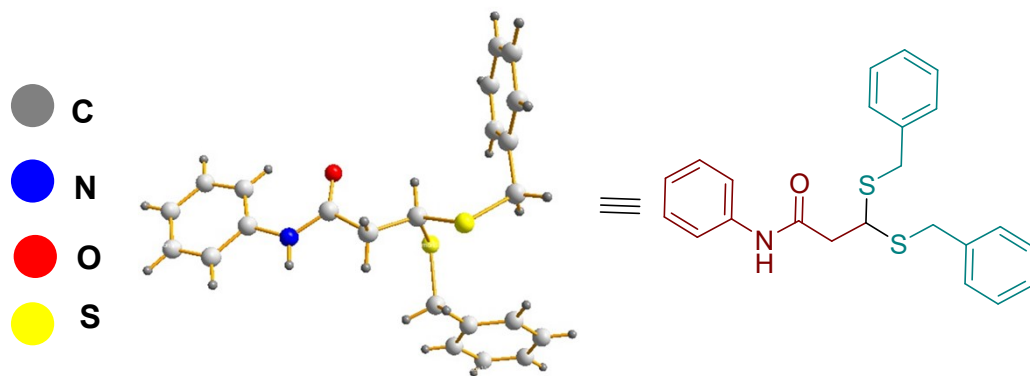

**Figure S1.** Crystal structure of (**3ad**) (CCDC 2044668).

### Crystallographic Data for (**3ad**)

|                                    |                                                  |
|------------------------------------|--------------------------------------------------|
| Empirical formula                  | C <sub>23</sub> H <sub>23</sub> NOS <sub>2</sub> |
| Formula weight                     | 393.54                                           |
| Temperature/K                      | 298.85(10)                                       |
| Crystal system                     | Monoclinic                                       |
| Space group                        | P2 <sub>1</sub> /c                               |
| a/Å                                | 12.4011(2)                                       |
| b/Å                                | 18.3334(4)                                       |
| c/Å                                | 9.57886(15)                                      |
| α/°                                | 90                                               |
| β/°                                | 91.0519(16)                                      |
| γ/°                                | 90                                               |
| Volume/Å <sup>3</sup>              | 2177.43(7)                                       |
| Z                                  | 4                                                |
| ρ <sub>calc</sub> /cm <sup>3</sup> | 1.200                                            |

|                                                       |                                            |
|-------------------------------------------------------|--------------------------------------------|
| $\mu/\text{mm}^{-1}$                                  | 2.296                                      |
| F(000)                                                | 832.0                                      |
| Crystal size/ $\text{mm}^3$                           | $0.2 \times 0.17 \times 0.18$              |
| Radiation                                             | $\text{CuK}\alpha$ ( $\lambda = 1.54184$ ) |
| Reflections collected                                 | 33898                                      |
| Independent reflections                               | 4456 [Rint = 0.0417, Rsigma = 0.0221]      |
| Goodness-of-fit on F2                                 | 1.061                                      |
| Final R indexes [ $I \geq 2\sigma(I)$ ]               | R1 = 0.0484, wR2 = 0.1314                  |
| Final R indexes [all data]                            | R1 = 0.0563, wR2 = 0.1371                  |
| Largest diff. peak/hole / $\text{e}\ \text{\AA}^{-3}$ | 0.27/-0.31                                 |

## References

- (1) SAINT+, Bruker AXS Inc., Madison, Wisconsin, USA, 1999 (Program for Reduction of Data collected on Bruker CCD Area Detector Diffractometer V. 6.02.)
- (2) SADABS, Bruker AXS, Madison, Wisconsin, USA, 2004
- (3) Sheldrick, G. A Short History of Shelx. *Acta Crystallogr. Sect. A* **2008**, *64*, 112-122.

## NMR SPECTRA

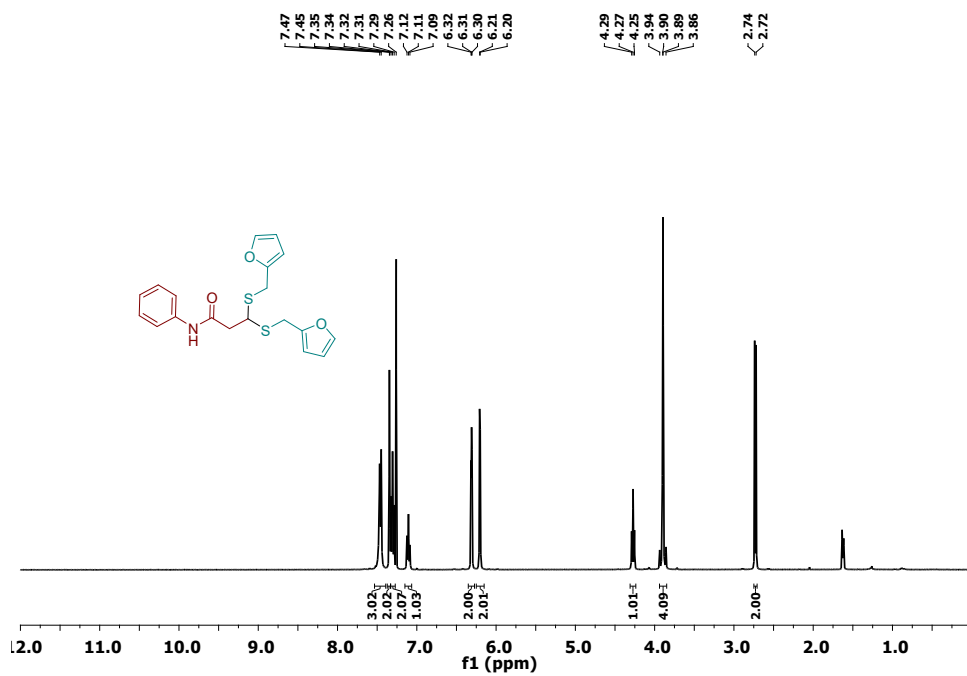

Figure S2. <sup>1</sup>H NMR spectrum of 3,3-bis((furan-2-ylmethyl)thio)-N-phenylpropanamide (**3aa**)

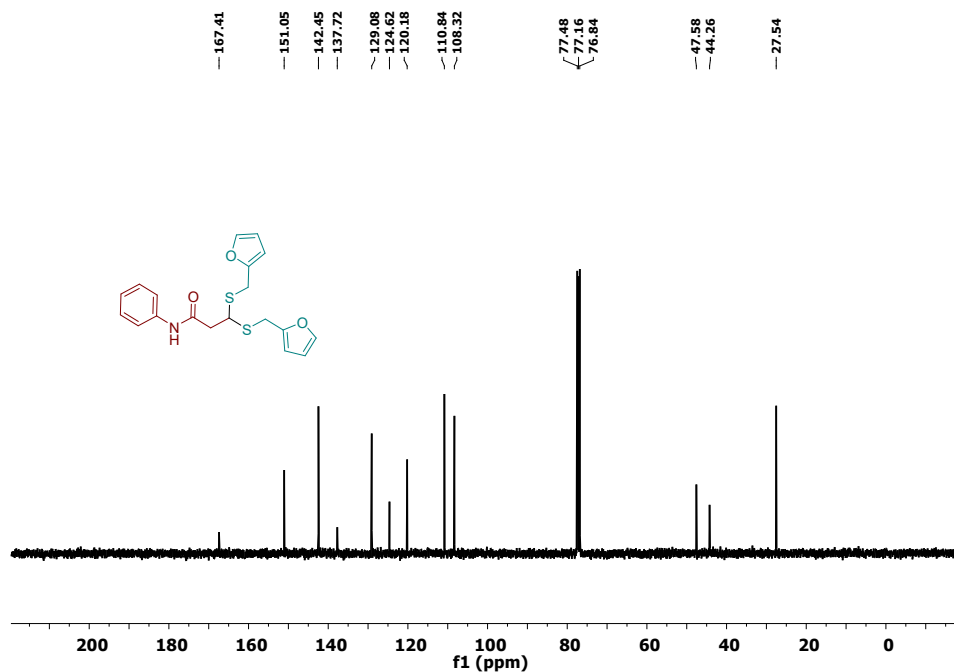

Figure S3. <sup>13</sup>C NMR spectrum of 3,3-bis((furan-2-ylmethyl)thio)-N-phenylpropanamide (**3aa**)

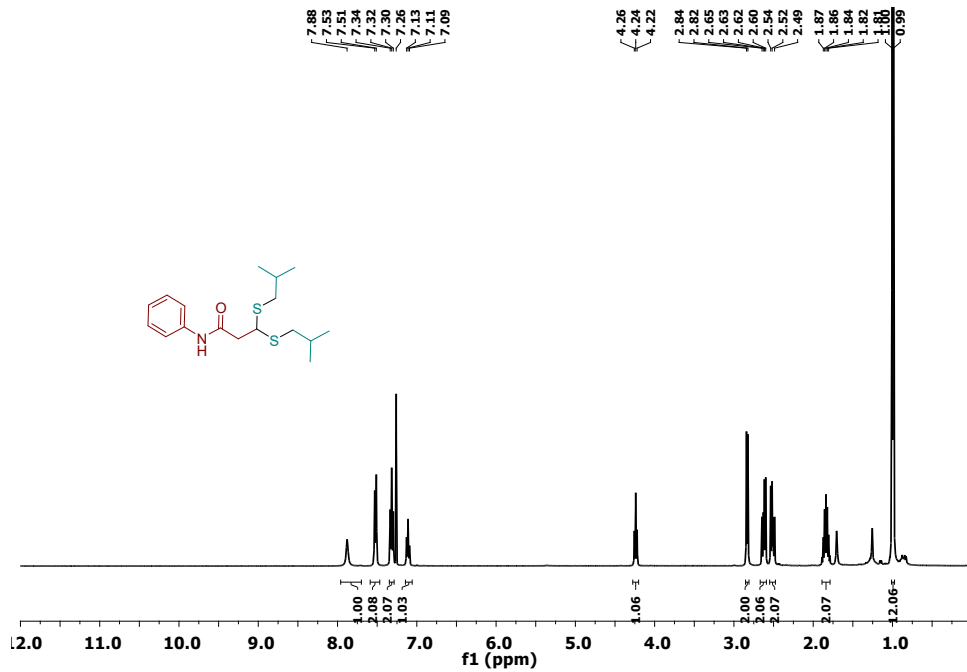

Figure S4.  $^1\text{H}$  NMR spectrum of 3,3-bis(isobutylthio)-N-phenylpropanamide (**3ab**)

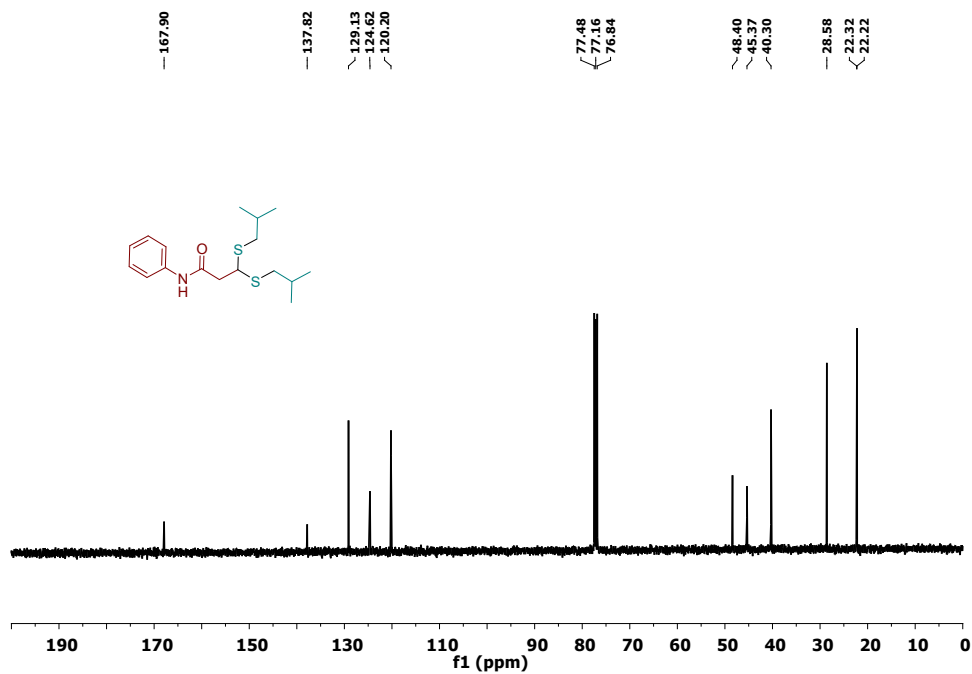

Figure S5.  $^{13}\text{C}$  NMR spectrum of 3,3-bis(isobutylthio)-N-phenylpropanamide (**3ab**)

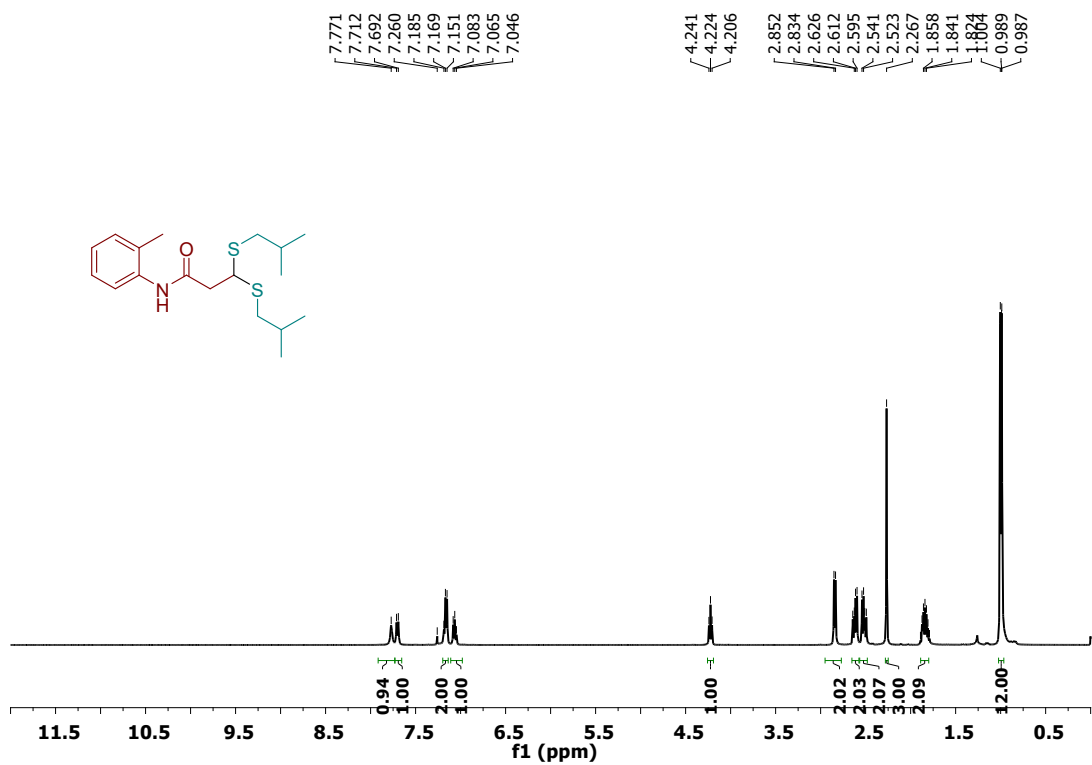

Figure S6. <sup>1</sup>H NMR spectrum of 3,3-bis(isobutylthio)-N-(o-tolyl)propanamide (3bb)

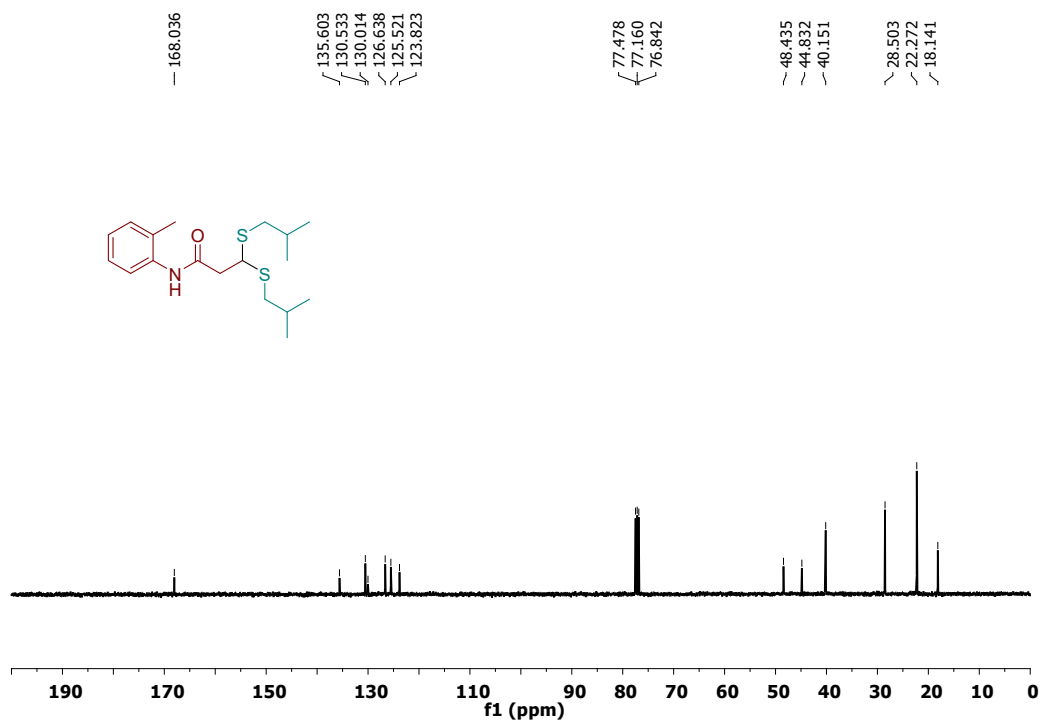

**Figure S7.**  $^{13}\text{C}$  NMR spectrum of 3,3-bis(isobutylthio)-N-phenylpropanamide (**3bb**)

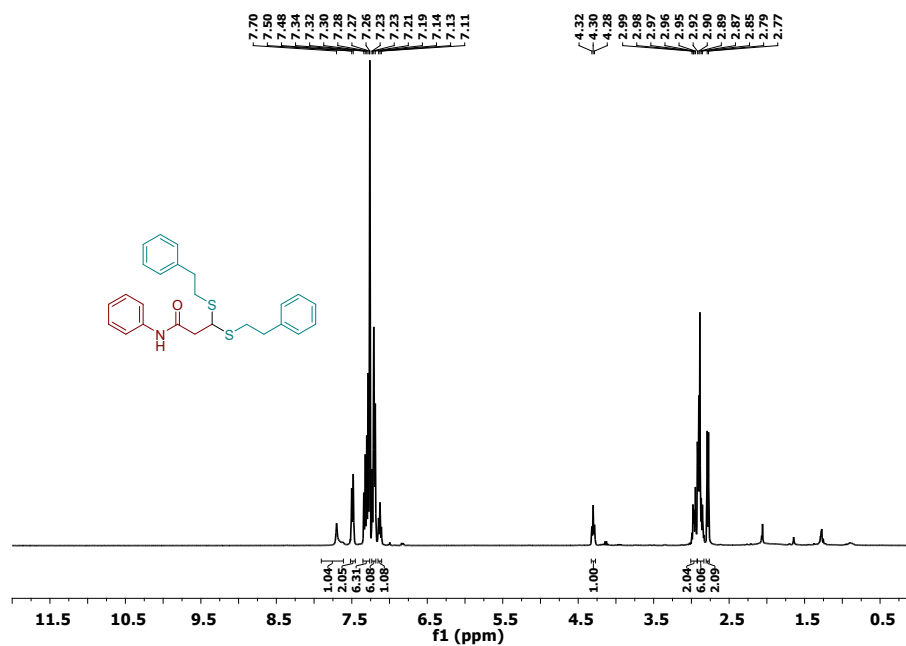

**Figure S8.**  $^1\text{H}$  NMR spectrum of 3,3-bis(phenethylthio)-N-phenylpropanamide (**3ac**)

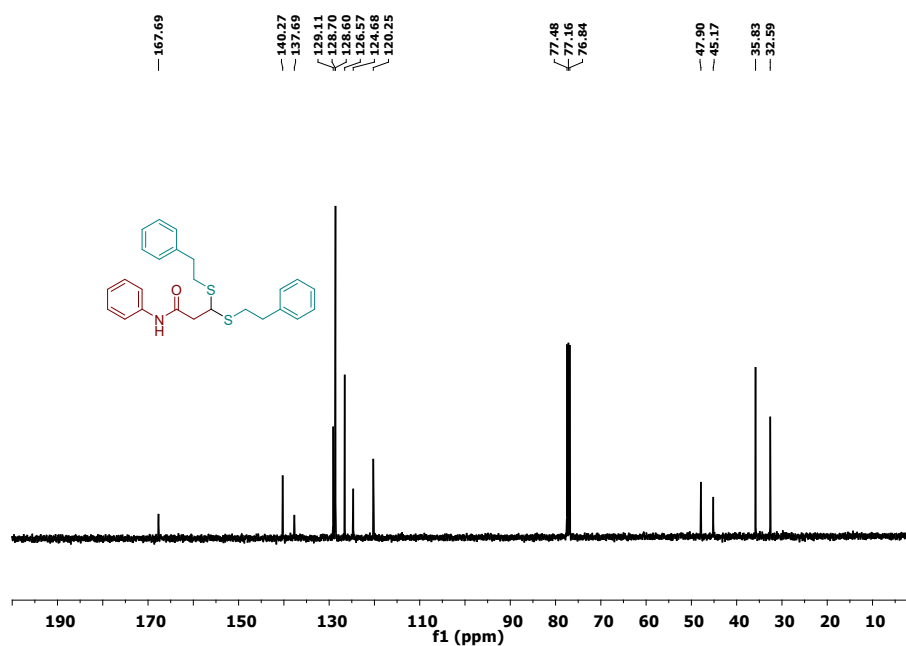

**Figure S9.**  $^{13}\text{C}$  NMR spectrum of 3,3-bis(phenethylthio)-N-phenylpropanamide (**3ac**)



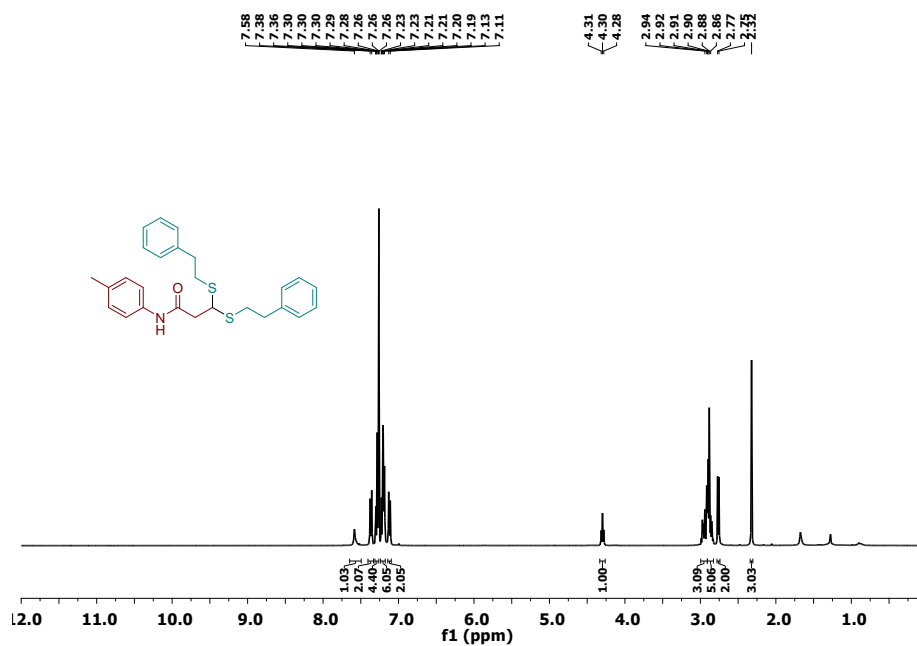

Figure S10.  $^1\text{H}$  NMR spectrum of 3,3-bis(phenethylthio)-N-(p-tolyl)propanamide (3cc)

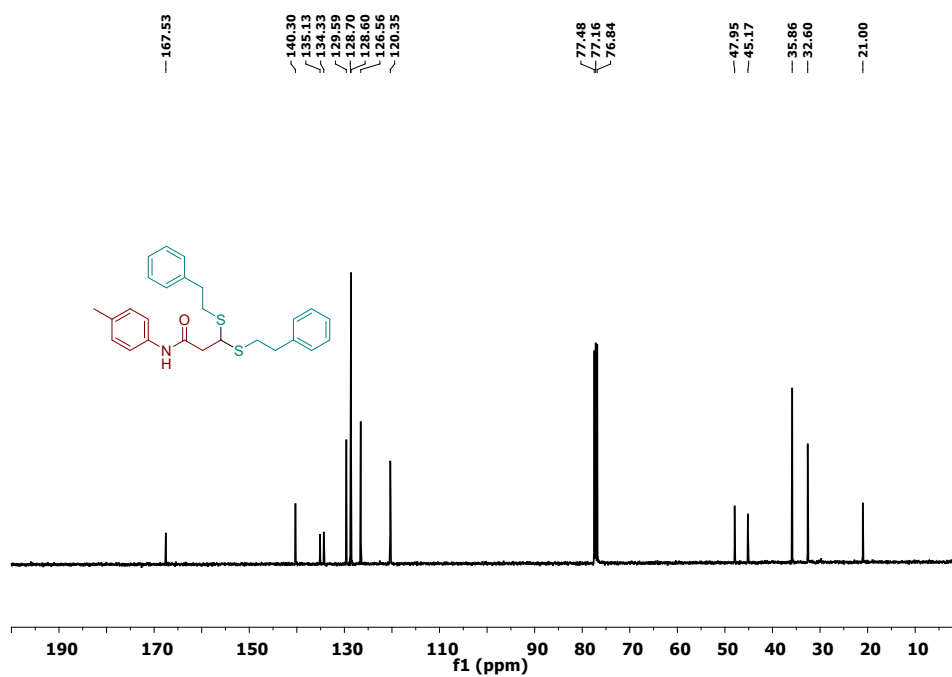

Figure S11.  $^{13}\text{C}$  NMR spectrum of 3,3-bis(phenethylthio)-N-(p-tolyl)propanamide (3cc)

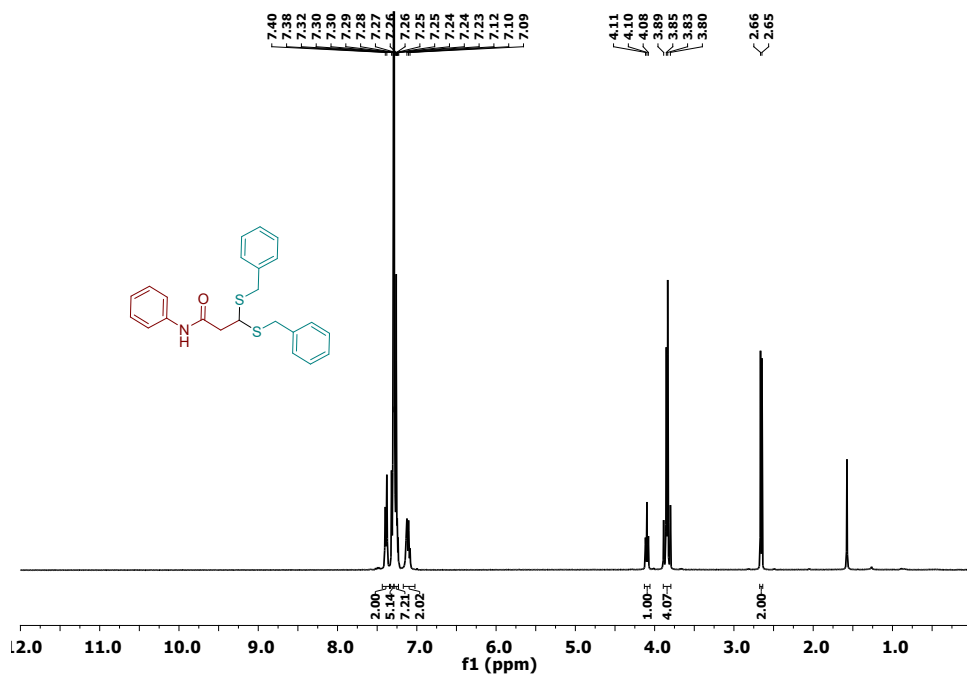

Figure S12.  $^1\text{H}$  NMR spectrum of 3,3-bis(benzylthio)-N-phenylpropanamide (**3ad**)

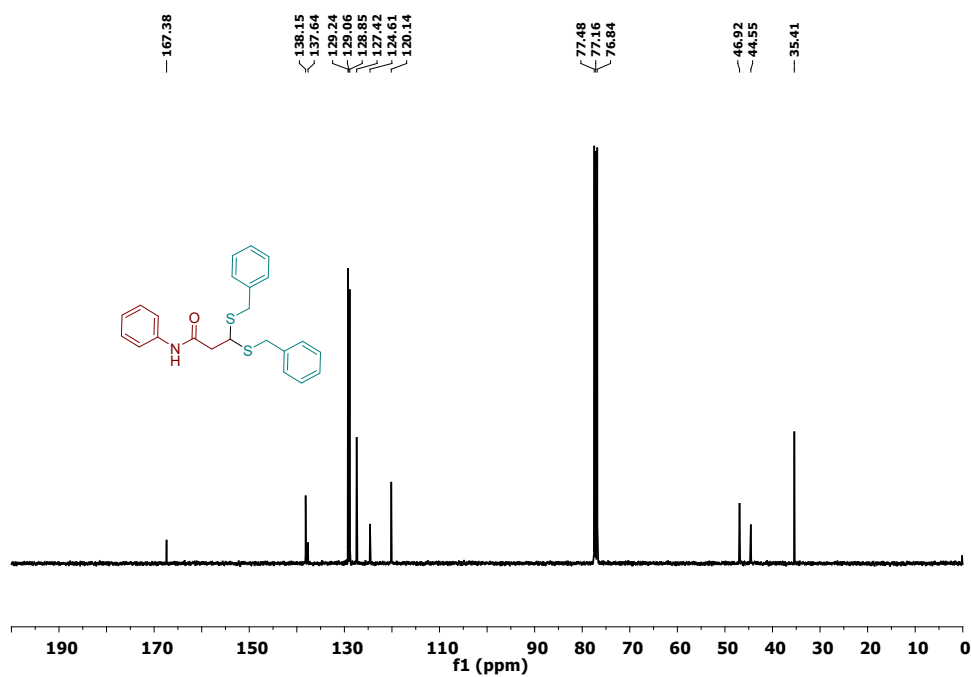

Figure S13.  $^{13}\text{C}$  NMR spectrum of 3,3-bis(benzylthio)-N-phenylpropanamide (**3ad**)

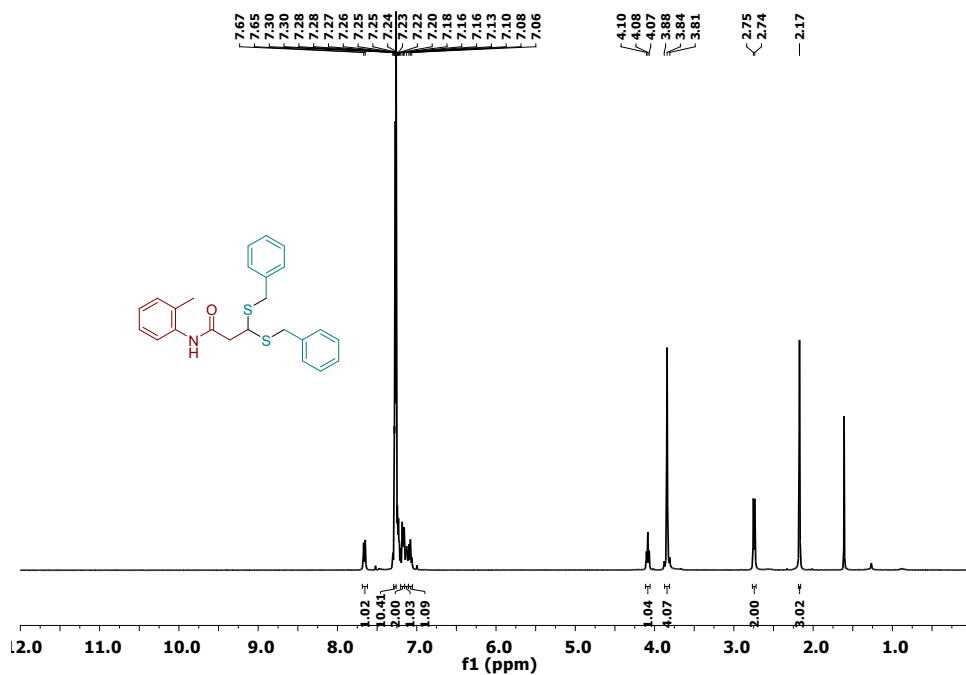

**Figure S14.** <sup>1</sup>H NMR spectrum of 3,3-bis(benzylthio)-N-(o-tolyl)propanamide (**3bd**)

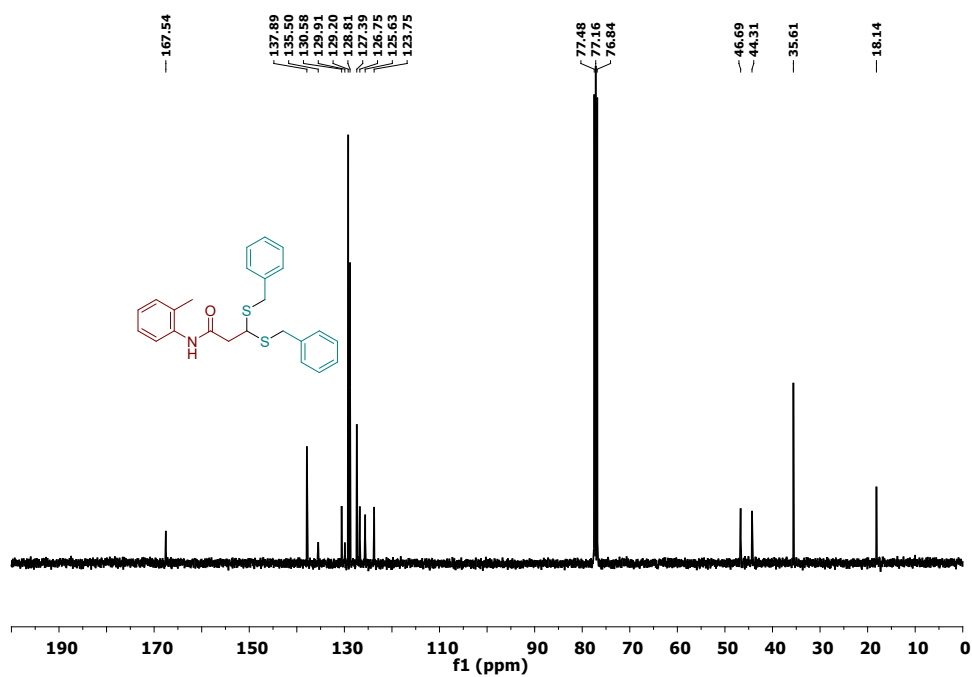

**Figure S15.** <sup>13</sup>C NMR spectrum of 3,3-bis(benzylthio)-N-(o-tolyl)propanamide (**3bd**)

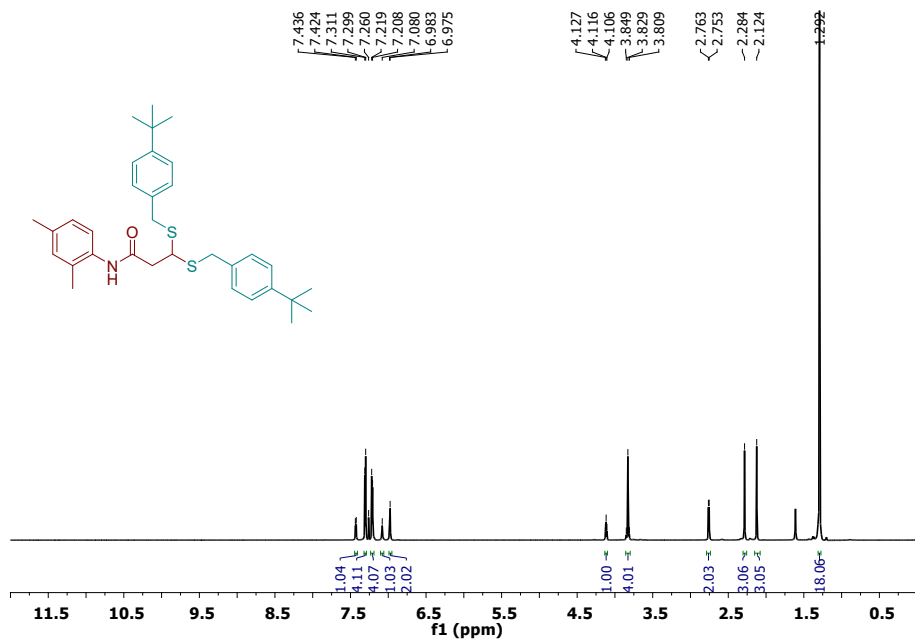

**Figure S16.** <sup>1</sup>H NMR spectrum of 3,3-bis((4-(tert-butyl)benzyl)thio)-N-(2,4-dimethylphenyl)propanamide (**3de**)

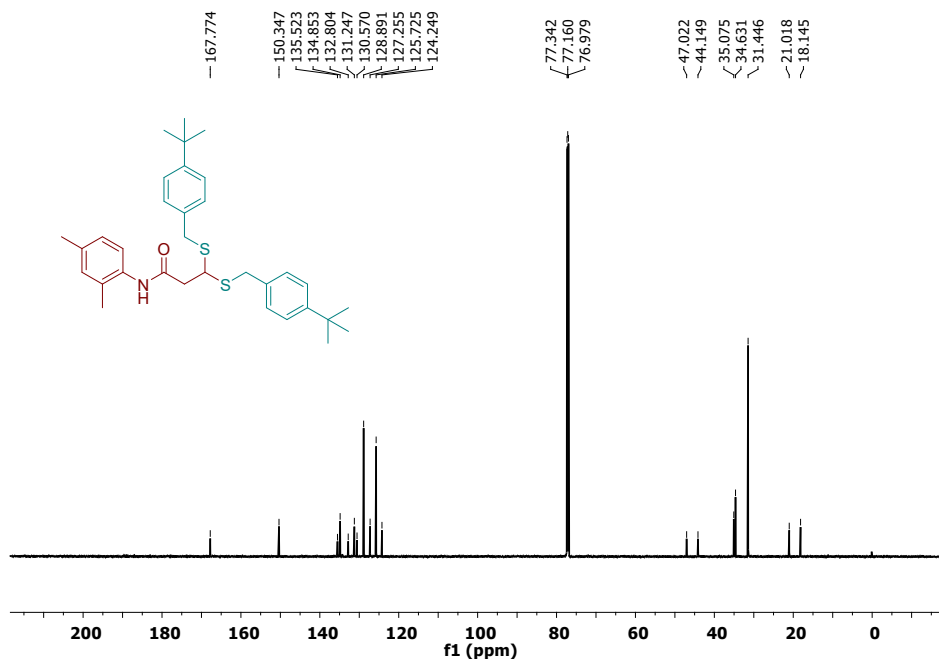

**Figure S17.** <sup>13</sup>C NMR spectrum of 3,3-bis((4-(tert-butyl)benzyl)thio)-N-(2,4-dimethylphenyl)propanamide (**3de**)

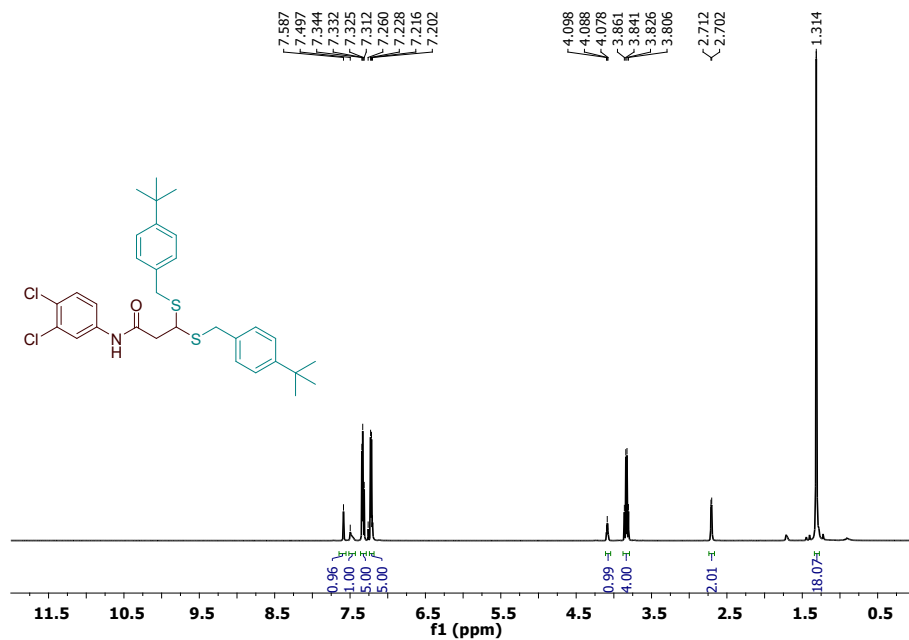

**Figure S18.** <sup>1</sup>H NMR spectrum of 3,3-bis((4-(tert-butyl)benzyl)thio)-N-(3,4-dichlorophenyl)propanamide (**3ee**)

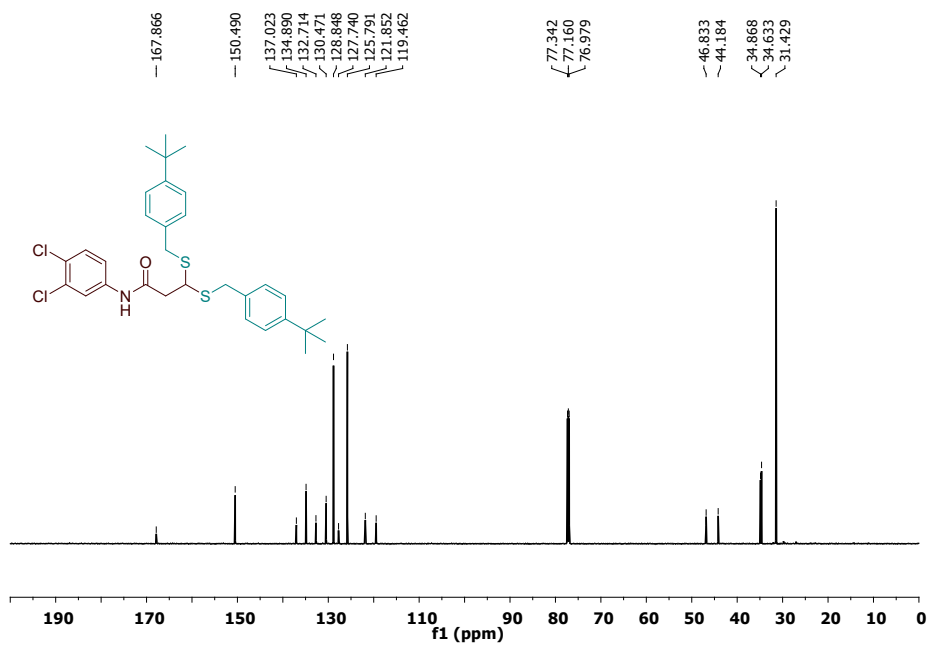

**Figure S19.** <sup>13</sup>C NMR spectrum of 3,3-bis((4-(tert-butyl)benzyl)thio)-N-(3,4-dichlorophenyl)propanamide (**3ee**)

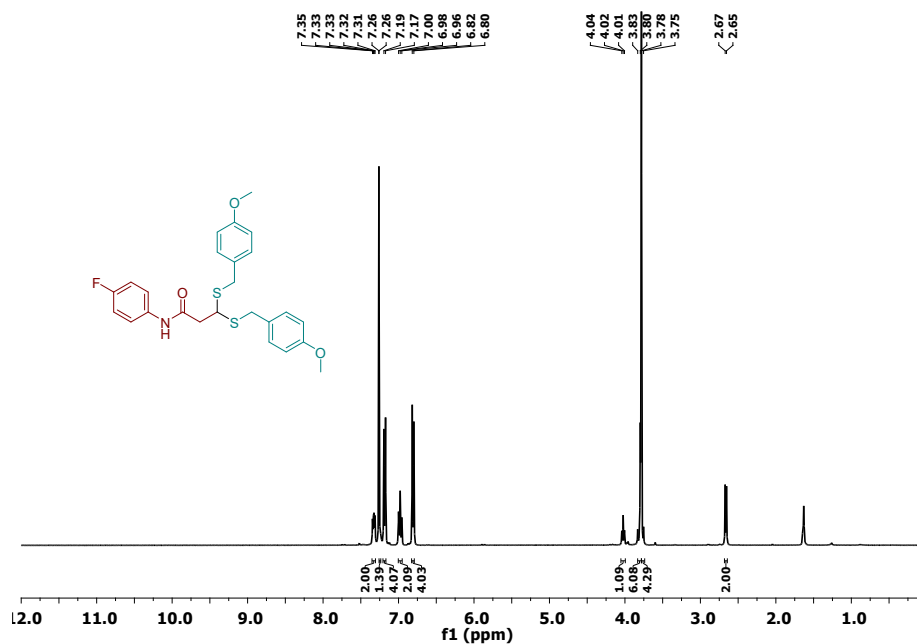

Figure S20. <sup>1</sup>H NMR spectrum of 3,3-bis(benzylthio)-N-(o-tolyl)propanamide (3ff)

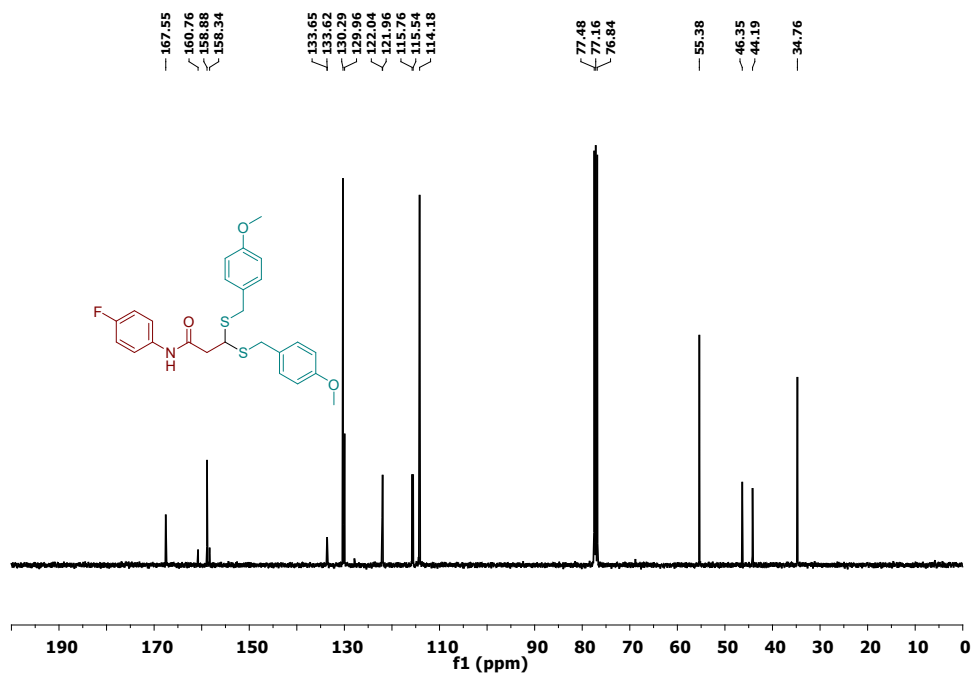

Figure S21. <sup>13</sup>C NMR spectrum of 3,3-bis(benzylthio)-N-(o-tolyl)propanamide (3ff)

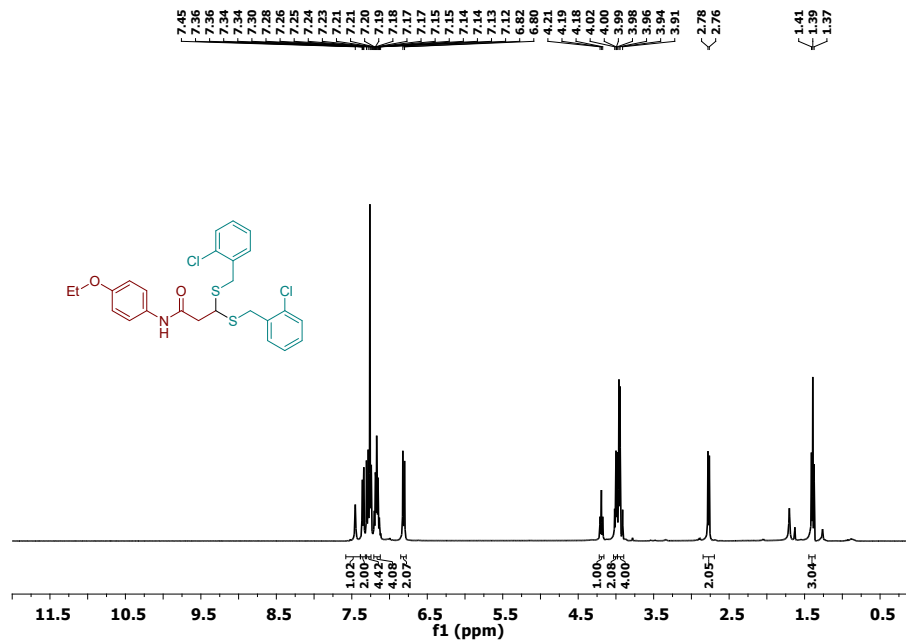

**Figure S22.** <sup>1</sup>H NMR spectrum of 3,3-bis((2-chlorobenzyl)thio)-N-(4-ethoxyphenyl)propanamide (**3gg**)

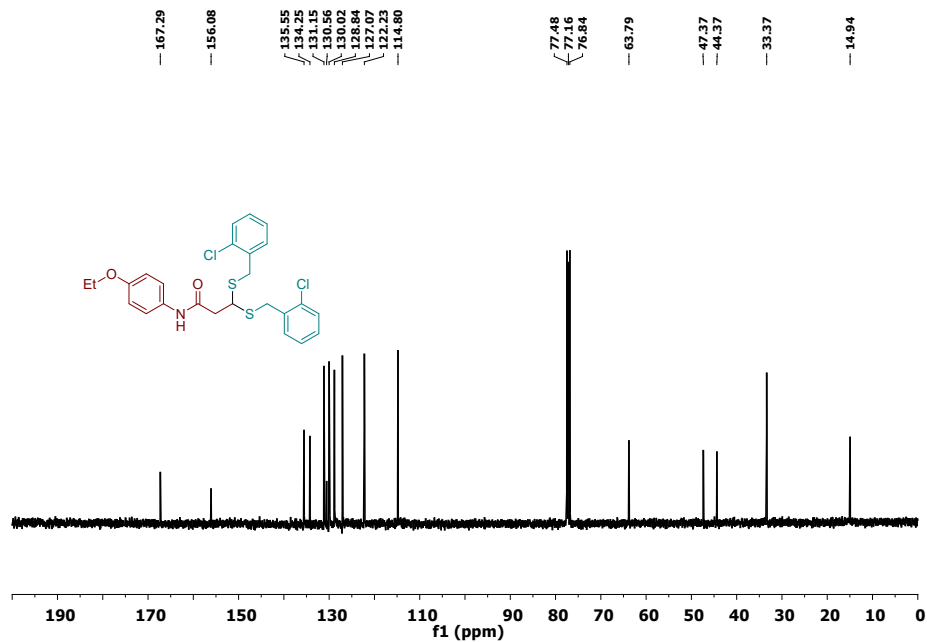

**Figure S23.** <sup>13</sup>C NMR spectrum of 3,3-bis((2-chlorobenzyl)thio)-N-(4-ethoxyphenyl)propanamide (**3gg**)

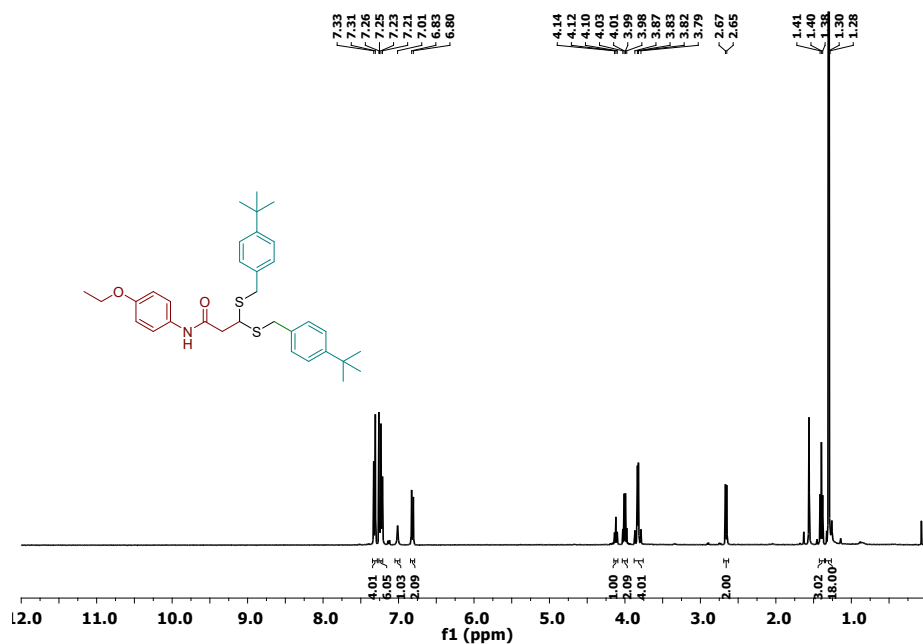

**Figure S24.** <sup>1</sup>H NMR spectrum of 3,3-bis((4-(tert-butyl)benzyl)thio)-N-(4-ethoxyphenyl)propanamide (**3ge**)

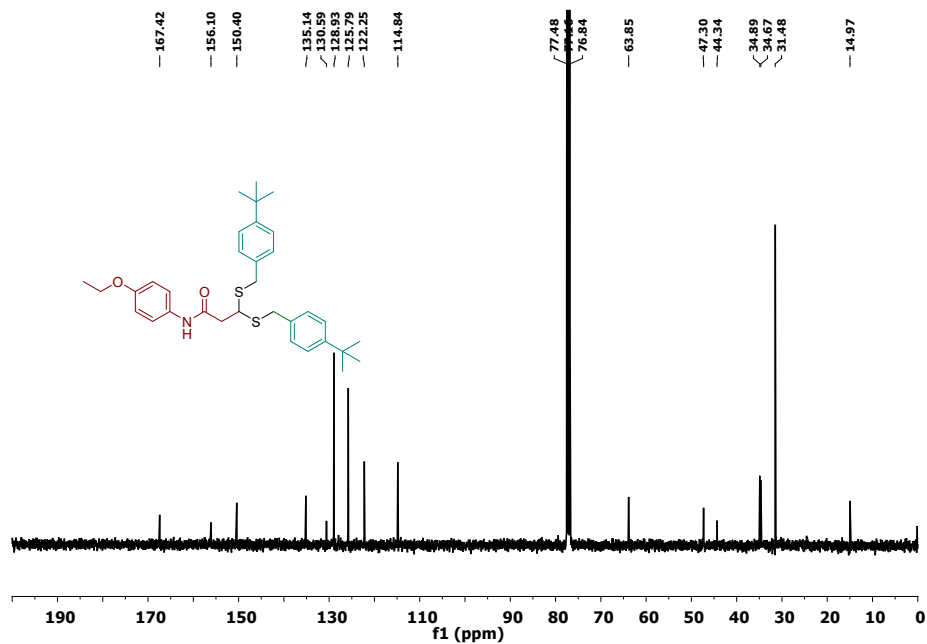

**Figure S25.** <sup>13</sup>C NMR spectrum of 3,3-bis((4-(tert-butyl)benzyl)thio)-N-(4-ethoxyphenyl)propanamide (**3ge**)



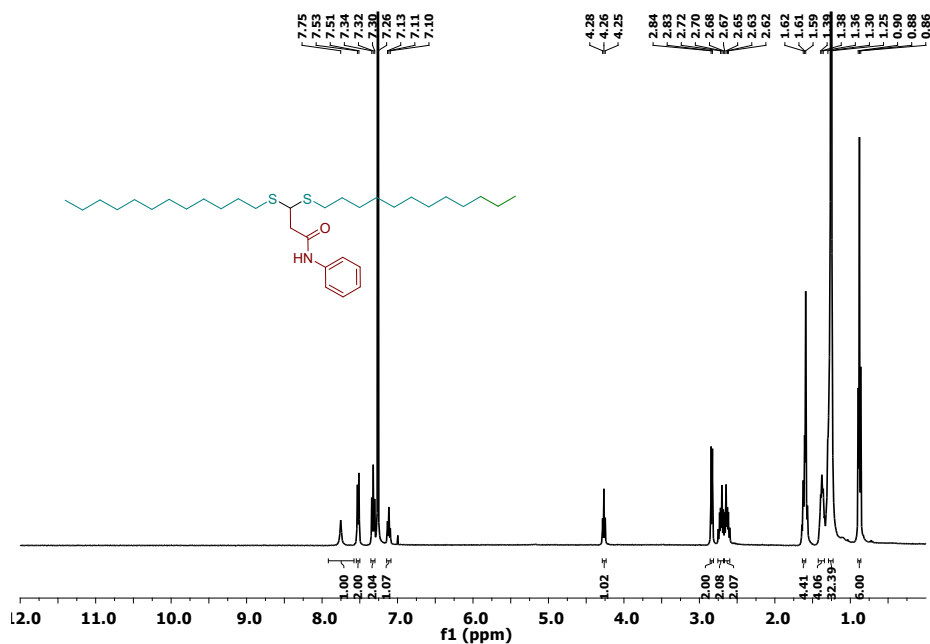

Figure S26.  $^1\text{H}$  NMR spectrum of 3,3-bis(dodecylthio)-N-phenylpropanamide (3ai)

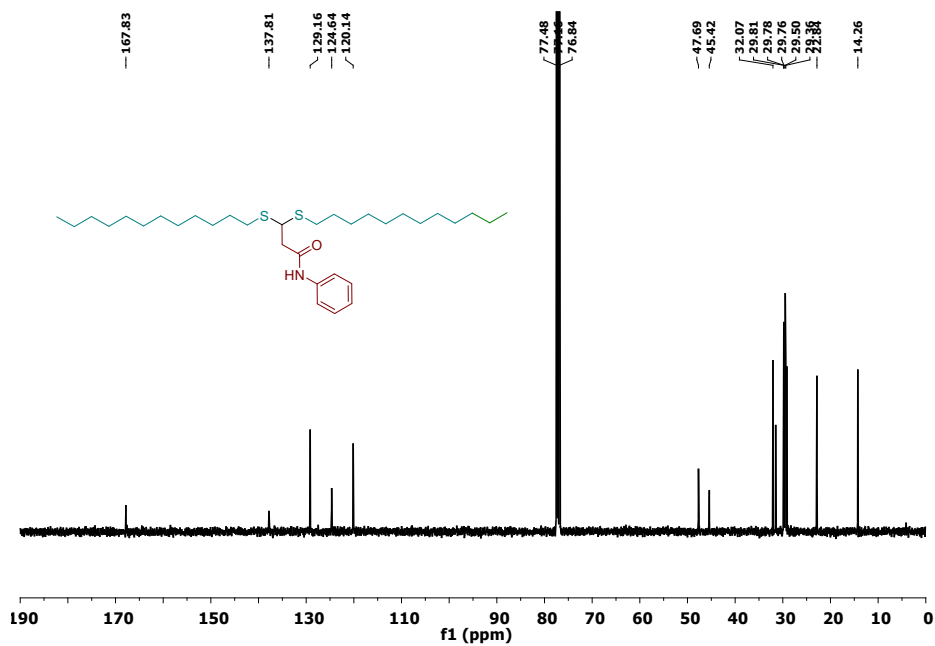

Figure S27.  $^{13}\text{C}$  NMR spectrum of 3,3-bis(dodecylthio)-N-phenylpropanamide (3ai)

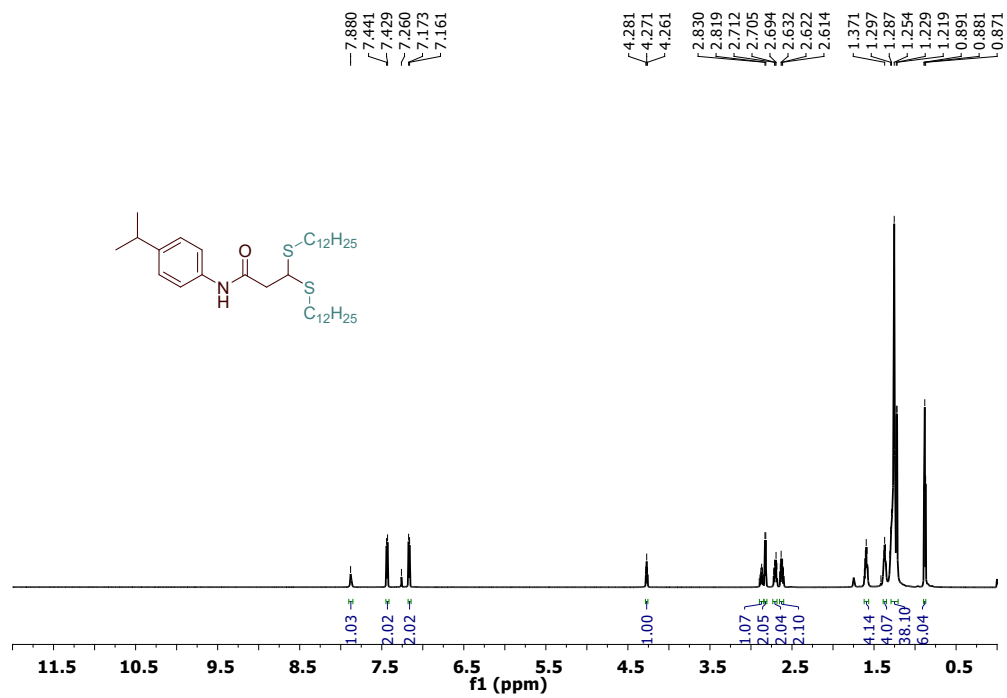

Figure S28. <sup>1</sup>H NMR spectrum of 3,3-bis(dodecylthio)-N-(4-isopropylphenyl)propanamide (**3hi**)

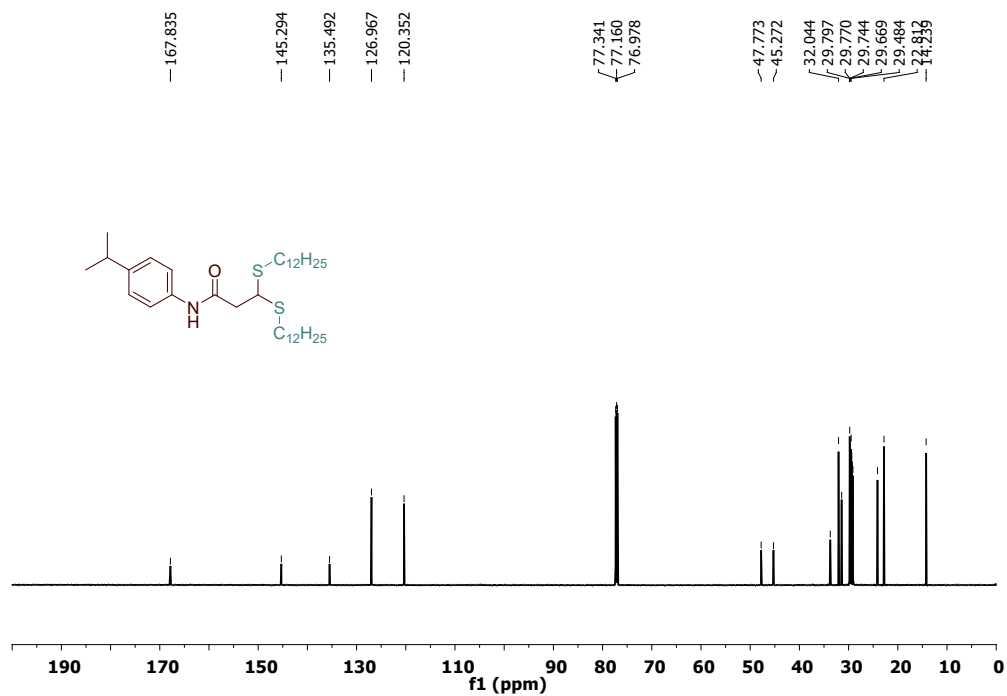

Figure S29.  $^{13}\text{C}$  NMR spectrum of 3,3-bis(dodecylthio)-N-(4-isopropylphenyl)propanamide

(3hi)

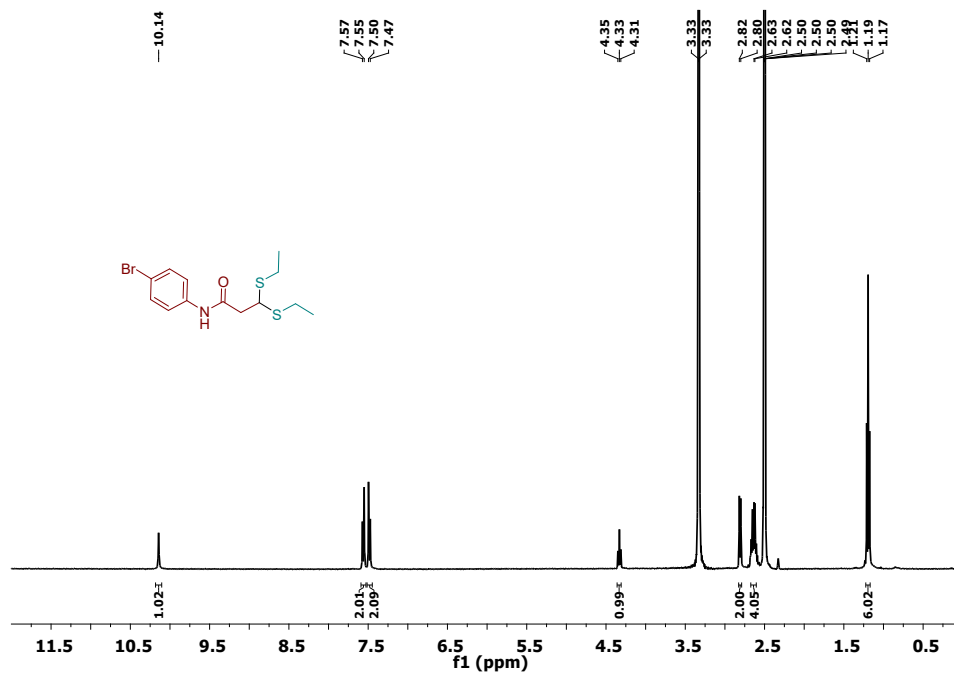

Figure S30.  $^1\text{H}$  NMR spectrum of N-(4-bromophenyl)-3,3-bis(ethylthio)propanamide (3ij)

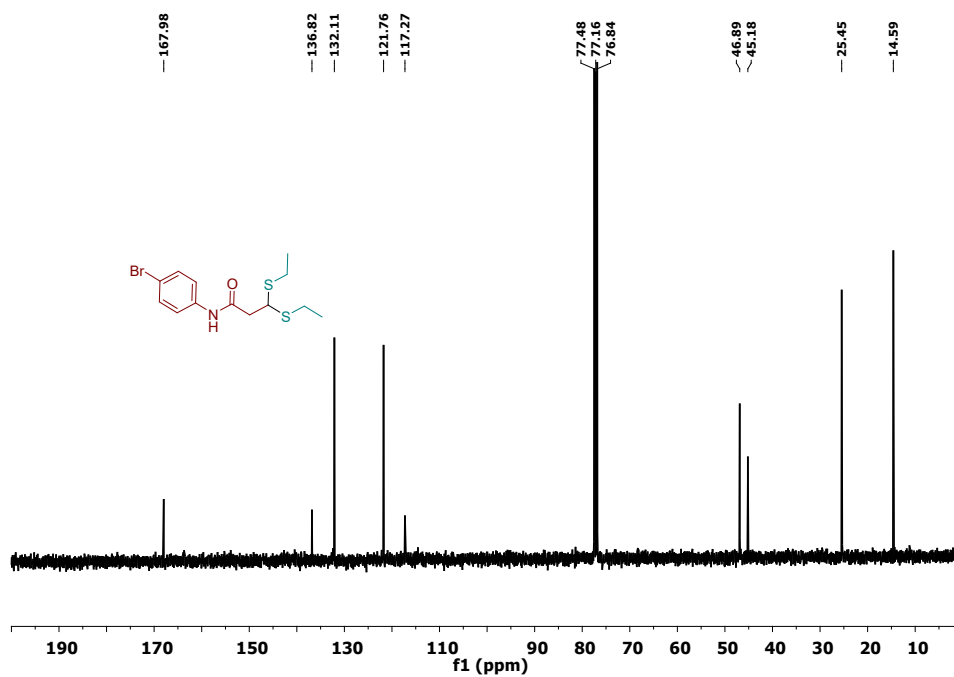

Figure S31.  $^{13}\text{C}$  NMR spectrum of N-(4-bromophenyl)-3,3-bis(ethylthio)propanamide (**3ij**)

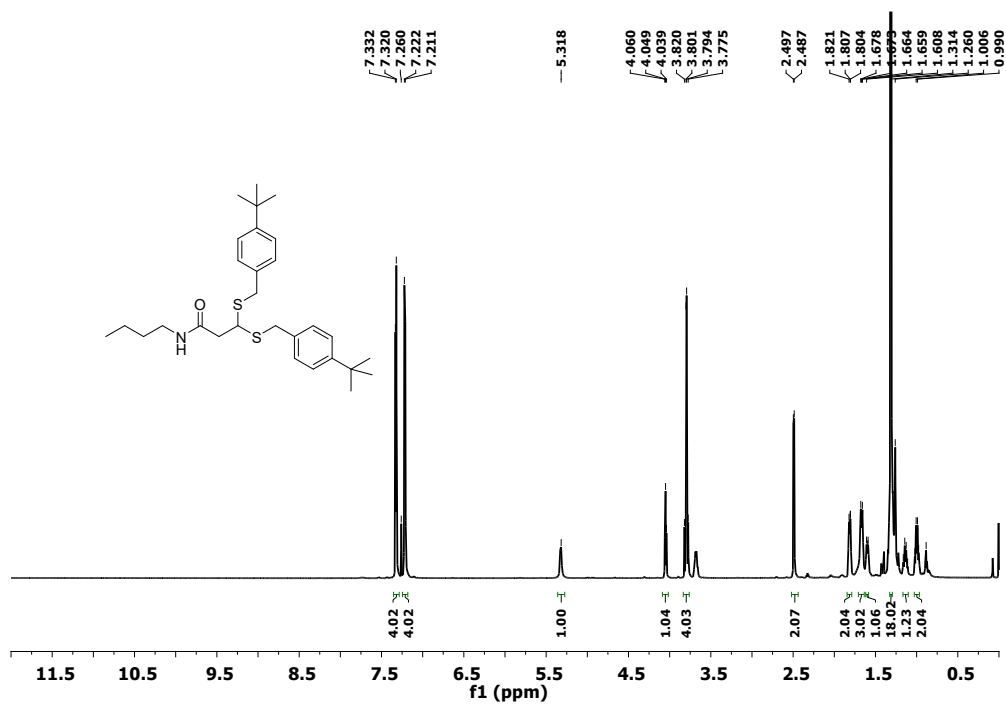

Figure S32.  $^1\text{H}$  NMR spectrum of N-butyl-3,3-bis((4-(tert-butyl)benzyl)thio)propanamide (**3je**)

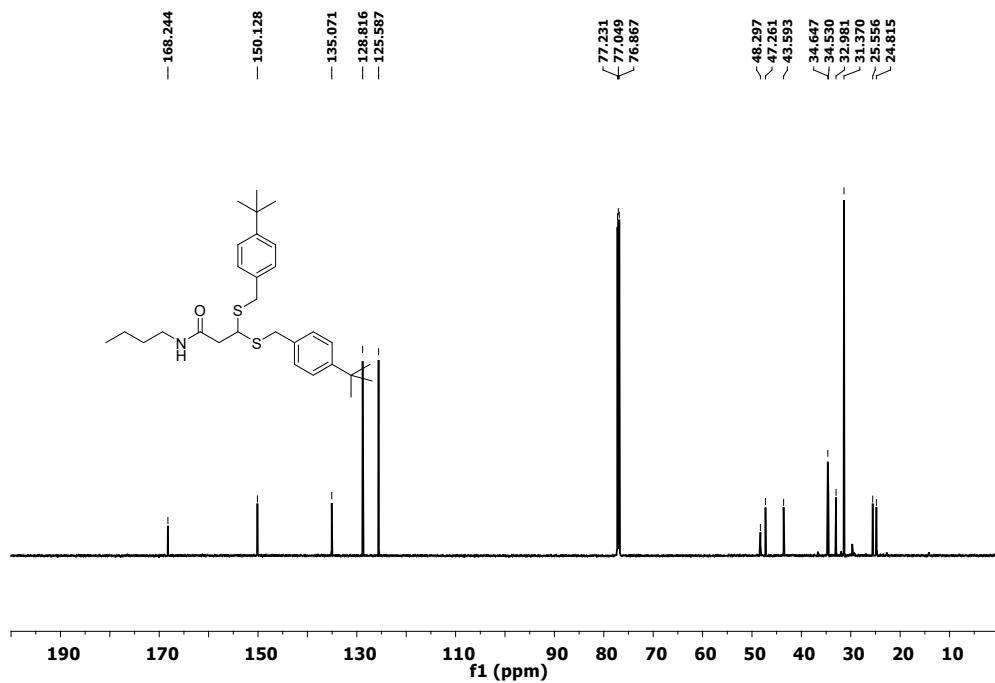

**Figure S33.**  $^{13}\text{C}$  NMR spectrum of N-butyl-3,3-bis((4-(tert-butyl)benzyl)thio)propanamide (**3je**)

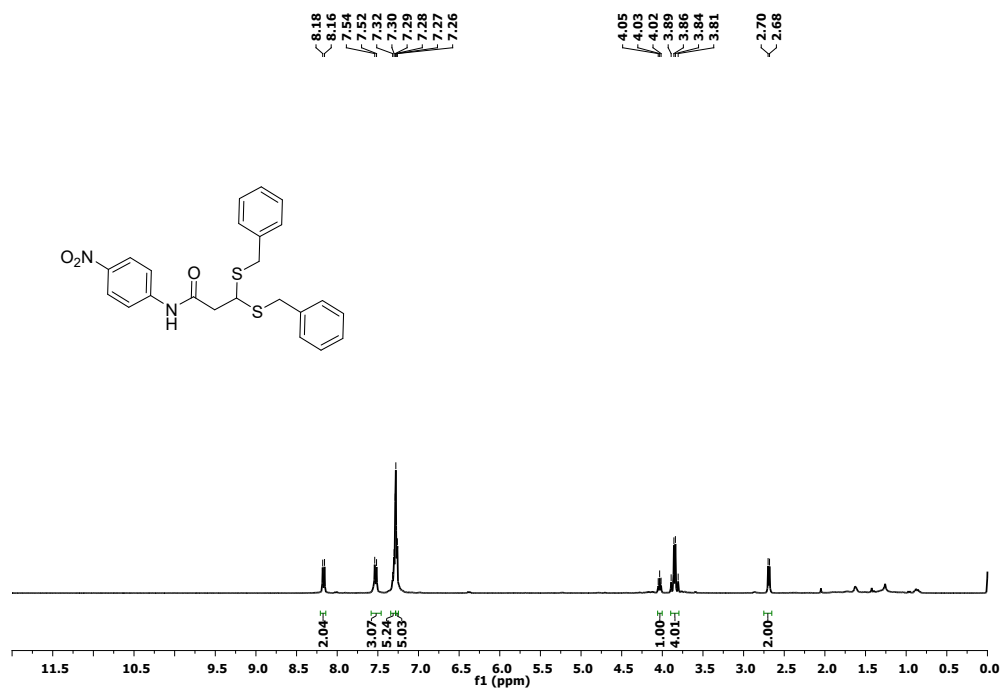

**Figure S34.**  $^1\text{H}$  NMR spectrum of 3,3-bis(benzylthio)-N-(4-nitrophenyl)propanamide (**3kd**)

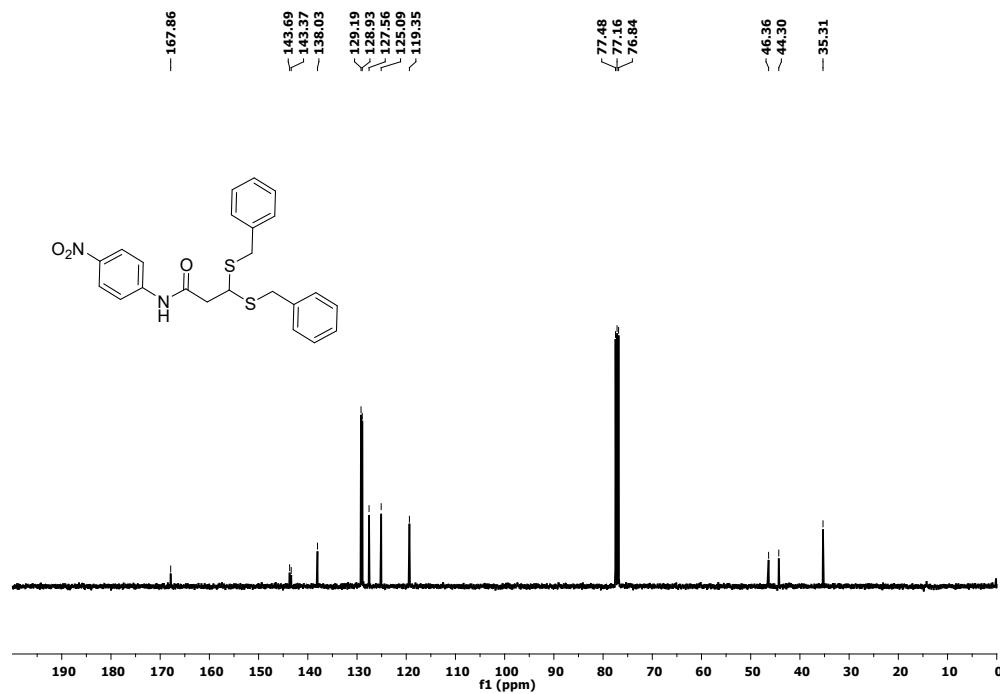

**Figure S35.**  $^{13}\text{C}$  NMR spectrum of 3,3-bis(benzylthio)-N-(4-nitrophenyl)propanamide (**3kd**)

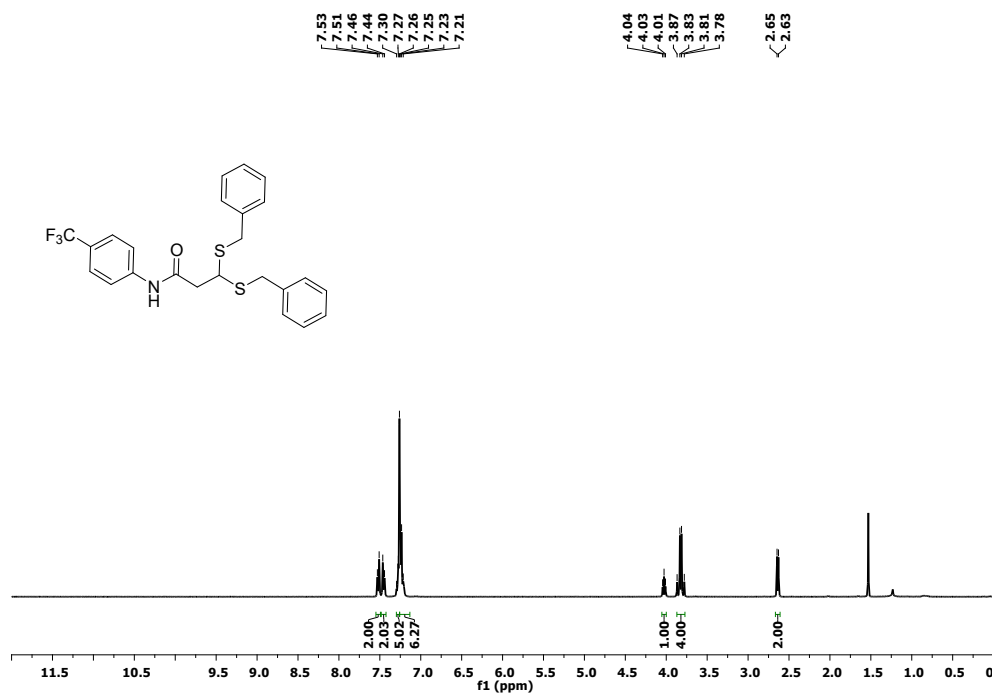

**Figure S36.**  $^1\text{H}$  NMR spectrum of 3,3-bis(benzylthio)-N-(4(trifluoromethyl)phenyl)propanamide (**3ld**)

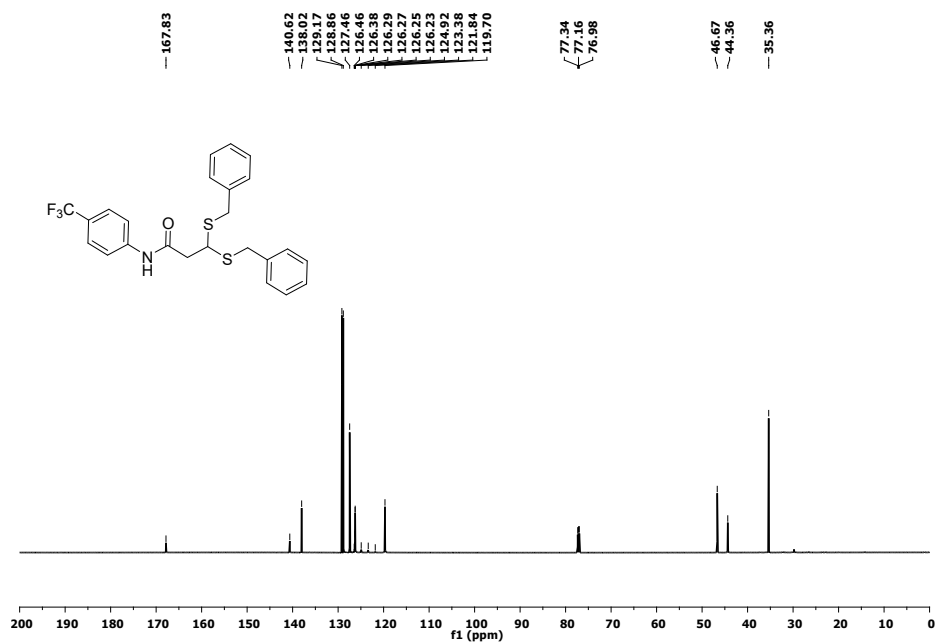

**Figure S37.**  $^{13}\text{C}$  NMR spectrum of spectrum of 3,3-bis(benzylthio)-N-(4(trifluoromethyl)phenyl)propanamide (**3ld**)

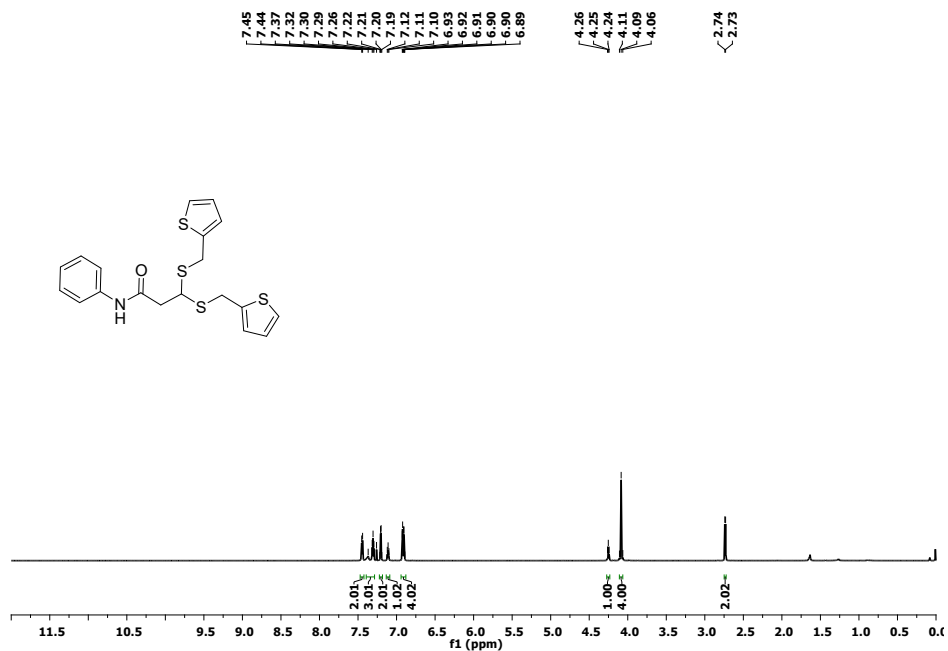

**Figure S38.**  $^1\text{H}$  NMR spectrum of N-phenyl-3,3-bis((thiophen-2-ylmethyl)thio)propanamide (**3ak**)

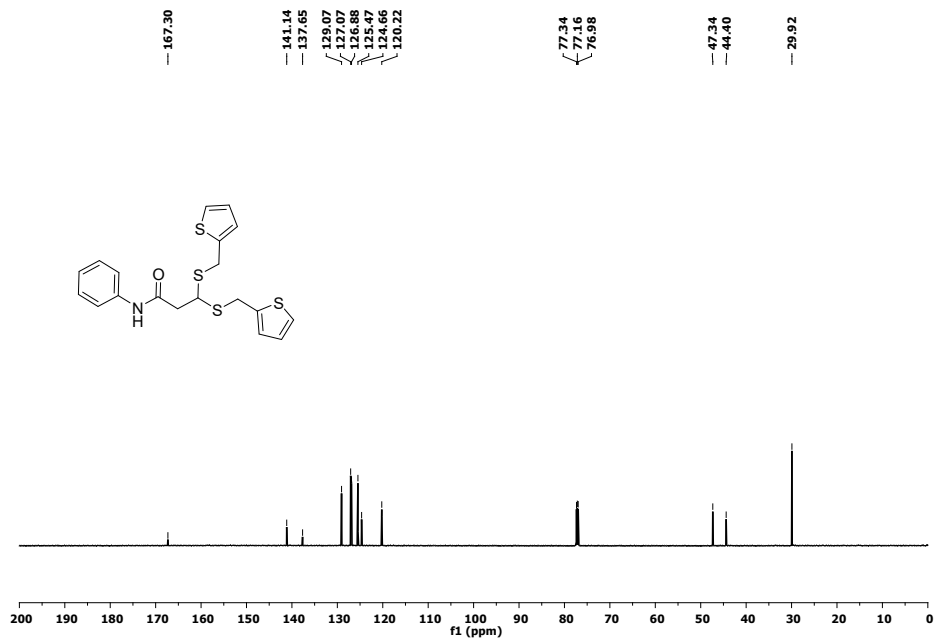

Figure S39.  $^{13}\text{C}$  NMR spectrum of N-phenyl-3,3-bis((thiophen-2-ylmethyl)thio)propanamide

(3ak)

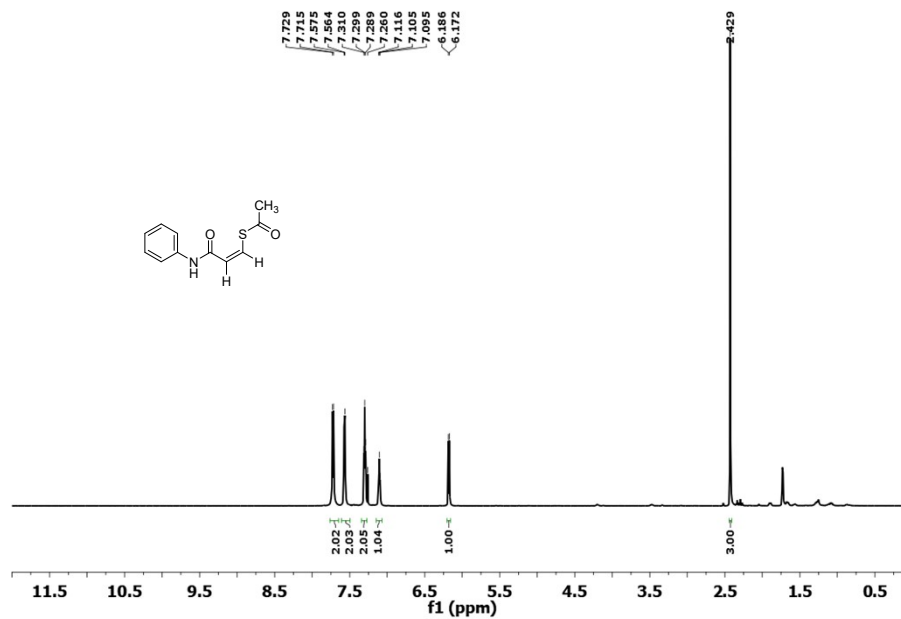

Figure S40.  $^1\text{H}$  NMR spectrum of (Z)-S-(3-oxo-3-(phenylamino)prop-1-en-1-yl) ethanethioate

(5)

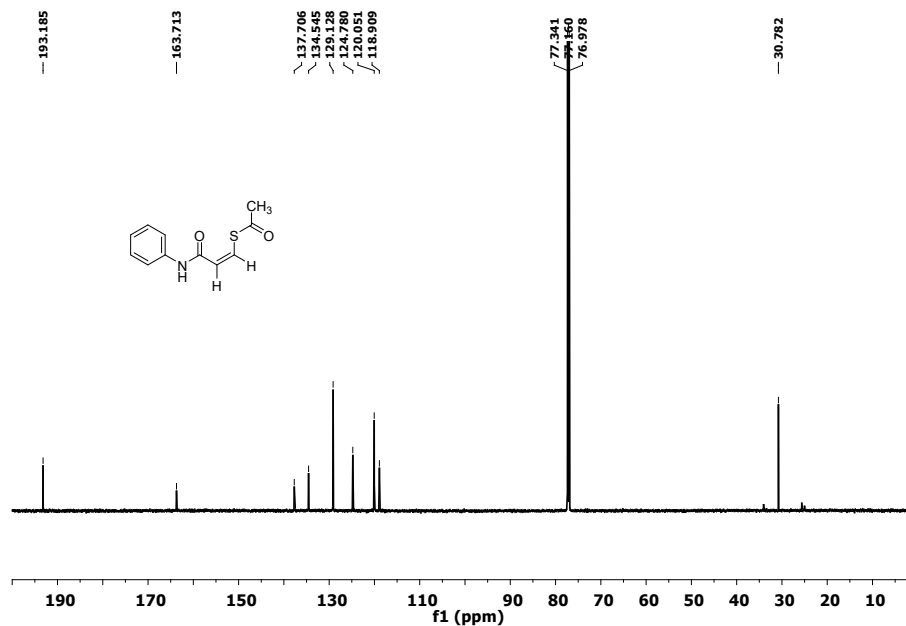



Figure S41.  $^{13}\text{C}$  NMR spectrum of (Z)-S-(3-oxo-3-(phenylamino)prop-1-en-1-yl) ethanethioate

(5)

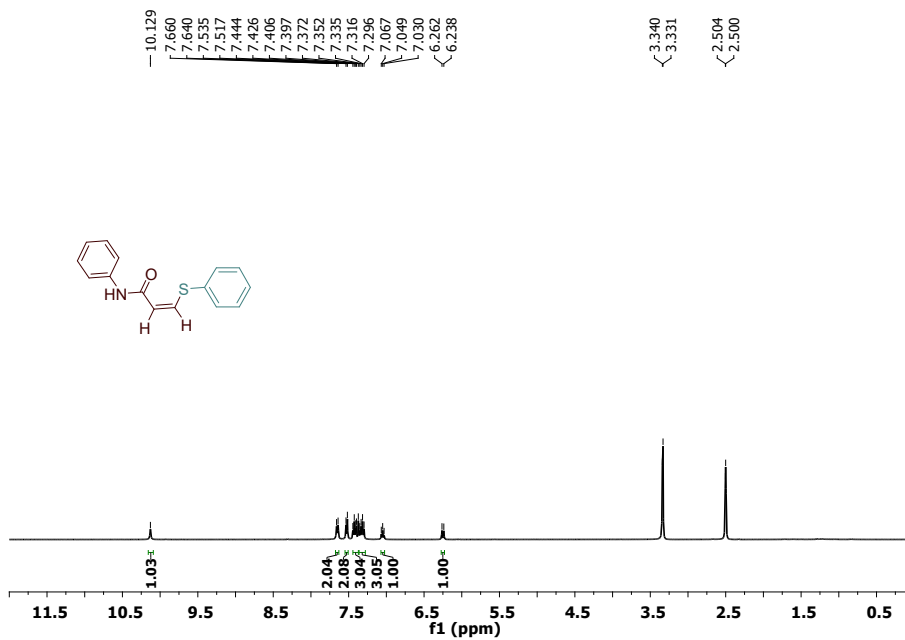

Figure S42.  $^1\text{H}$  NMR spectrum of (Z)-N-Phenyl-3-(phenylthio)acrylamide (6)

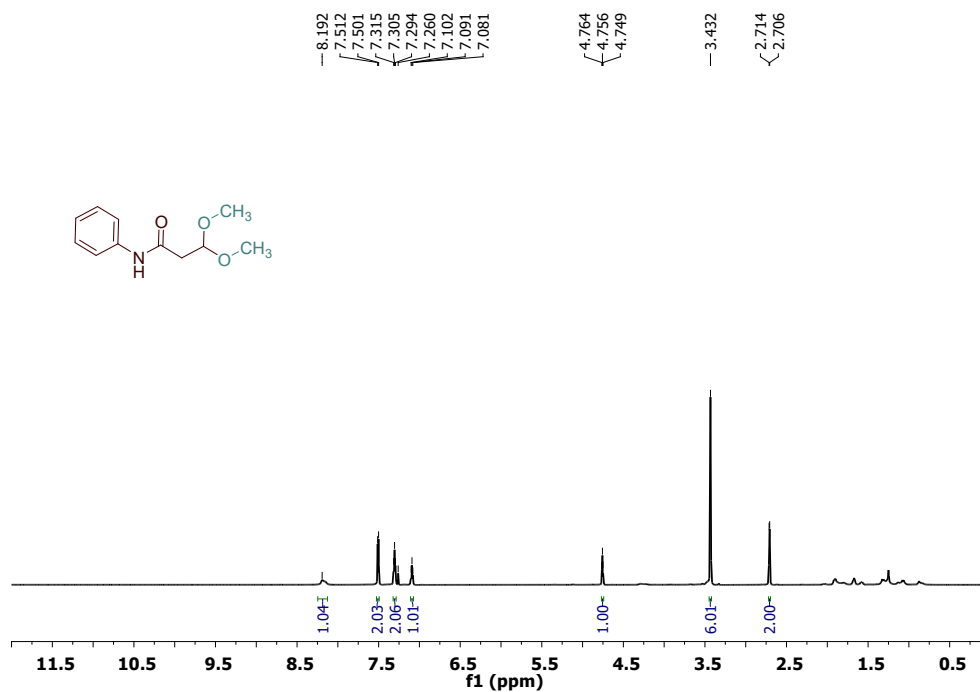

Fig. S43. <sup>1</sup>H NMR spectrum of 3,3-dimethoxy-N-phenylpropanamide (4aa)

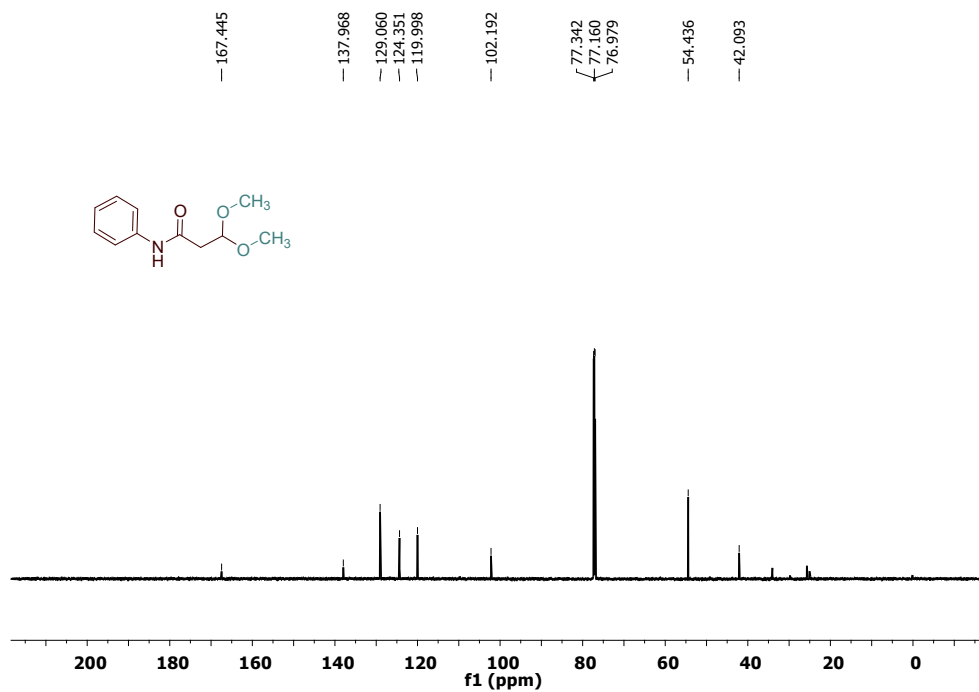

Fig. S44. <sup>13</sup>C NMR spectrum of 3,3-dimethoxy-N-phenylpropanamide (4aa)

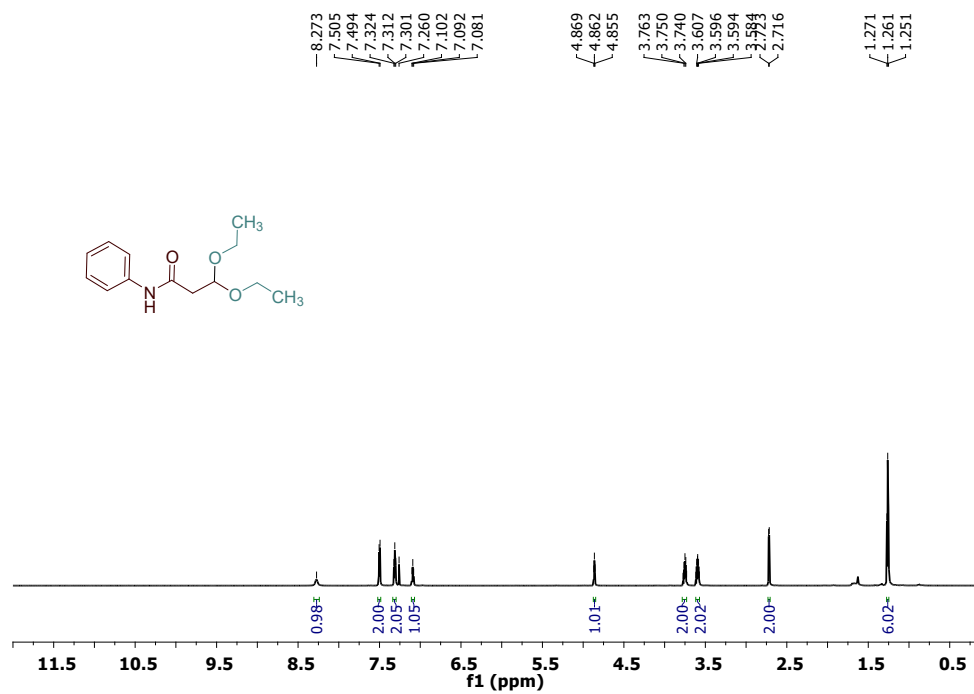

**Fig. S45.**  $^1\text{H}$  NMR spectrum of 3,3-diethoxy-N-phenylpropanamide (**4ab**)

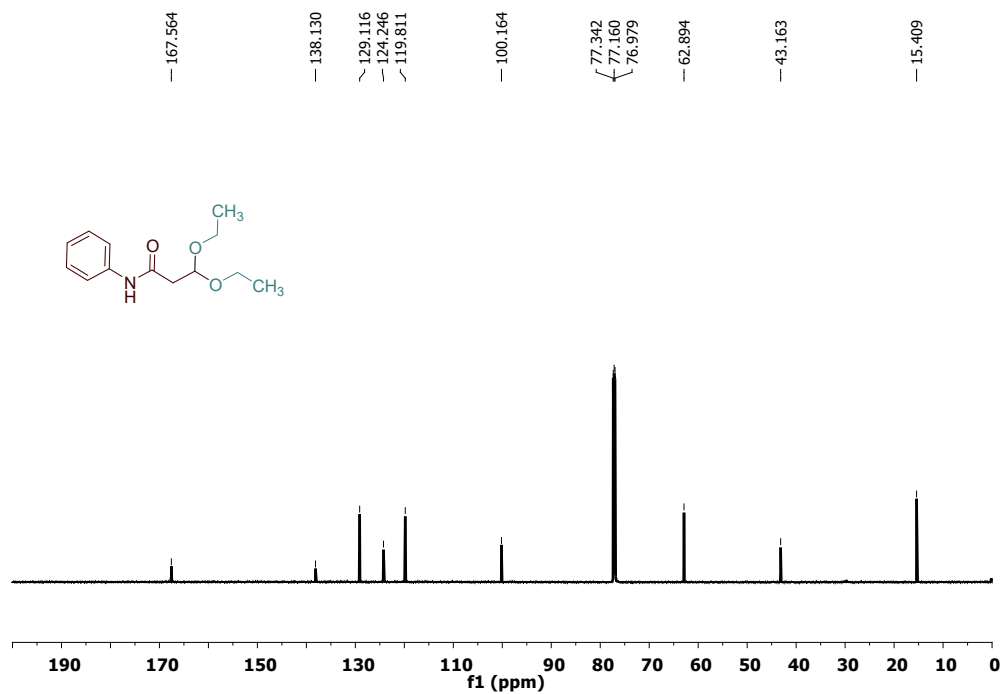

**Fig. S46.**  $^{13}\text{C}$  NMR spectrum of 3,3-diethoxy-N-phenylpropanamide (**4ab**)

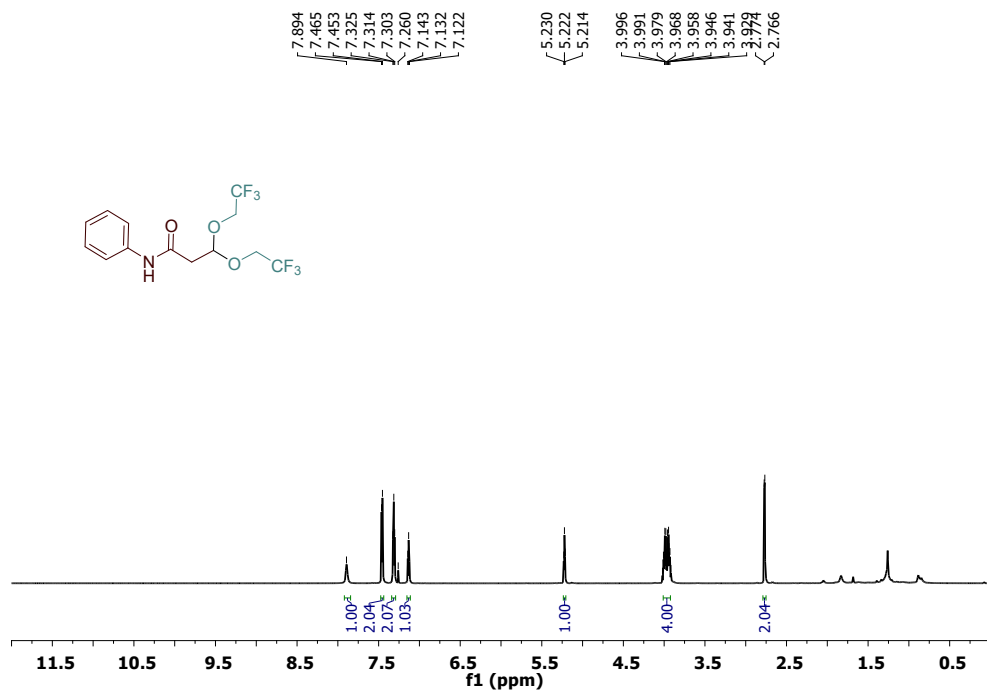

Fig. S47.  $^1\text{H}$  NMR spectrum of N-phenyl-3,3-bis(2,2,2-trifluoroethoxy)propanamide (**4ac**)

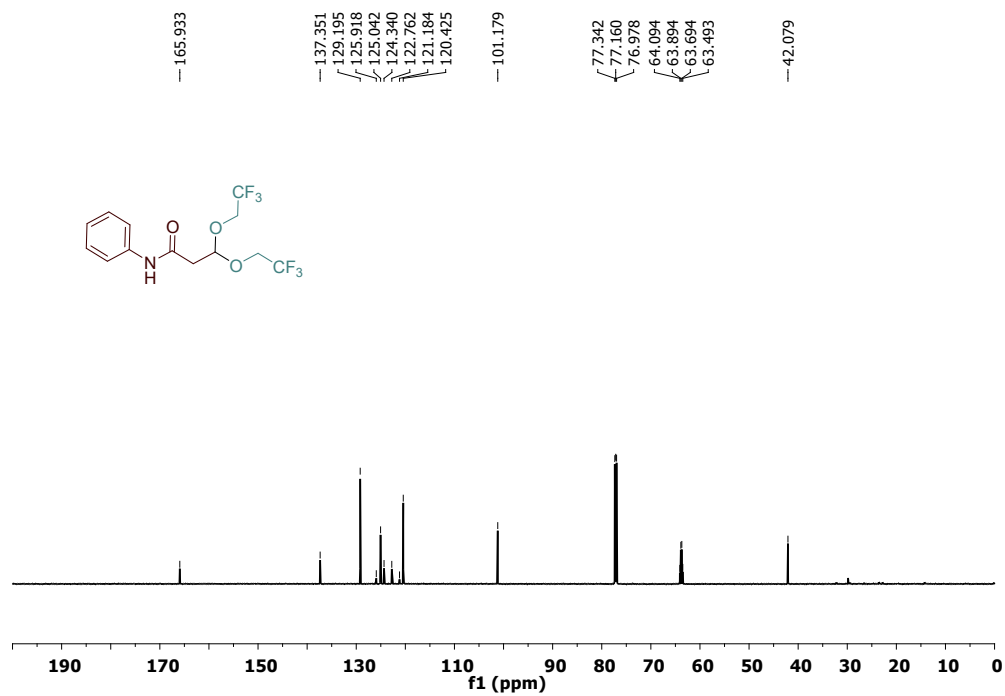

Fig. S48.  $^{13}\text{C}$  NMR spectrum of N-phenyl-3,3-bis(2,2,2-trifluoroethoxy)propanamide (**4ac**)

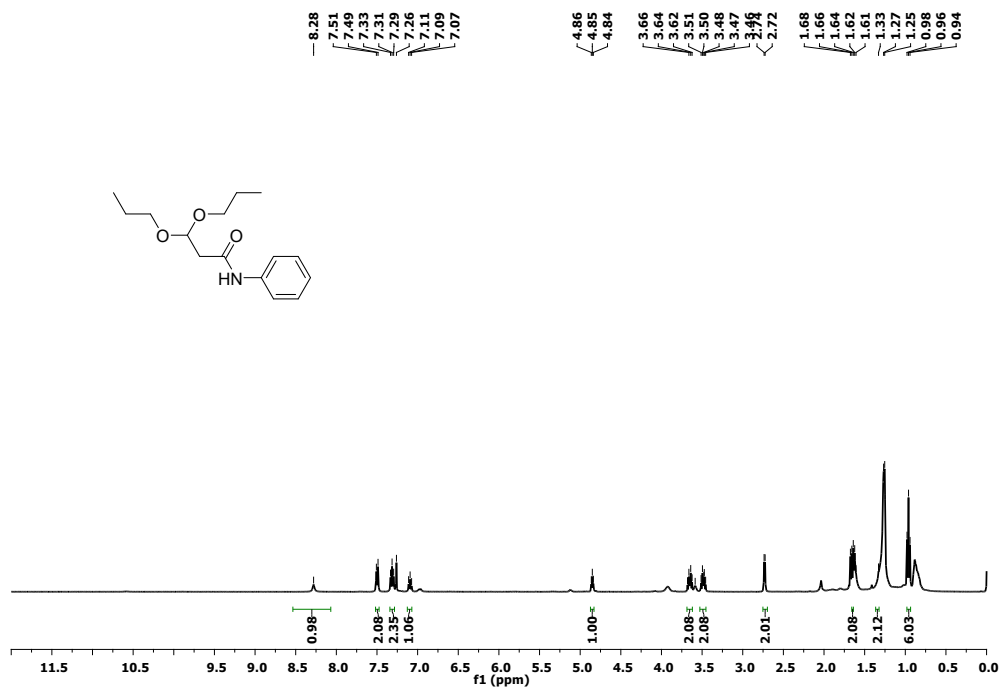

Fig. S49.  $^1\text{H}$  NMR spectrum of N-phenyl-3,3-dipropoxypropanamide (4ad)

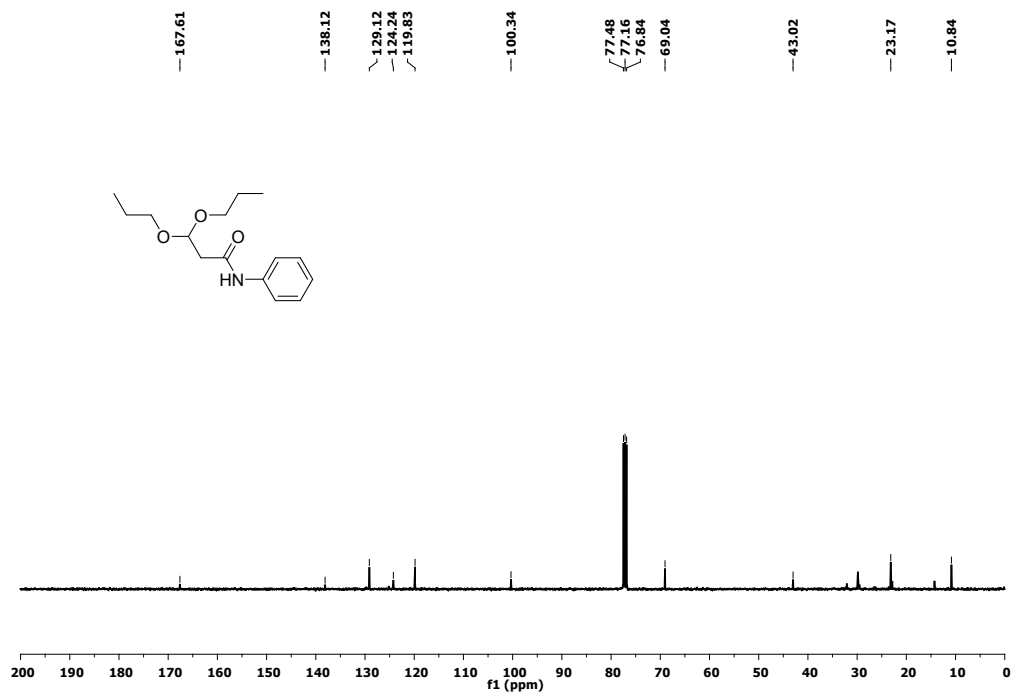

Fig. S50.  $^{13}\text{C}$  NMR spectrum of N-phenyl-3,3-dipropoxypropanamide (4ad)

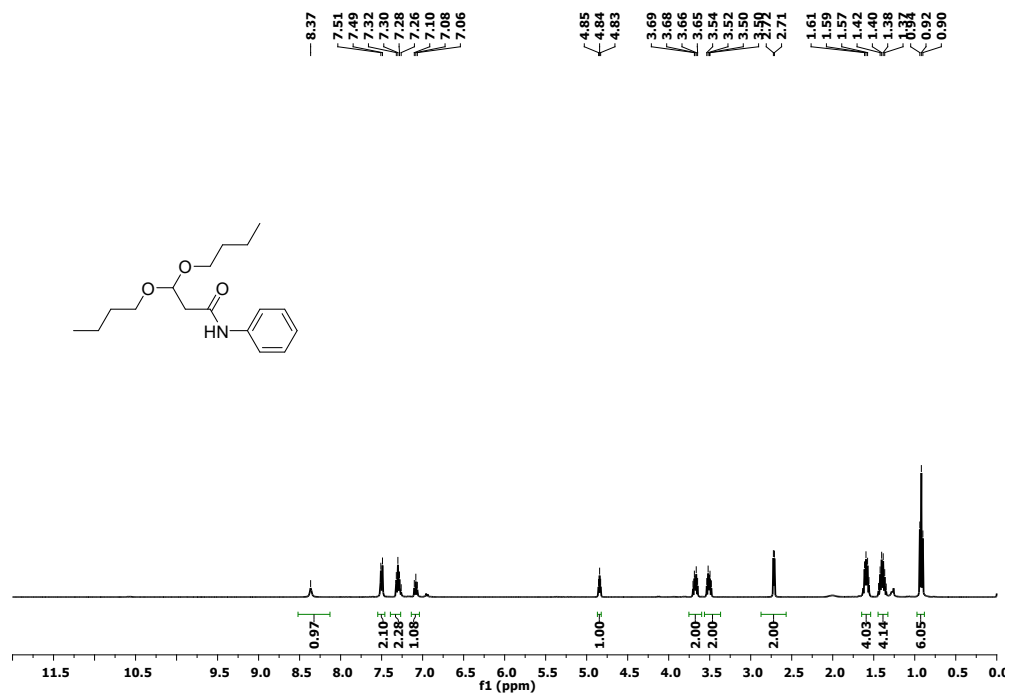

Fig. S51. <sup>1</sup>H NMR spectrum of 3,3-dibutoxy-N-phenylpropanamide (4ae)

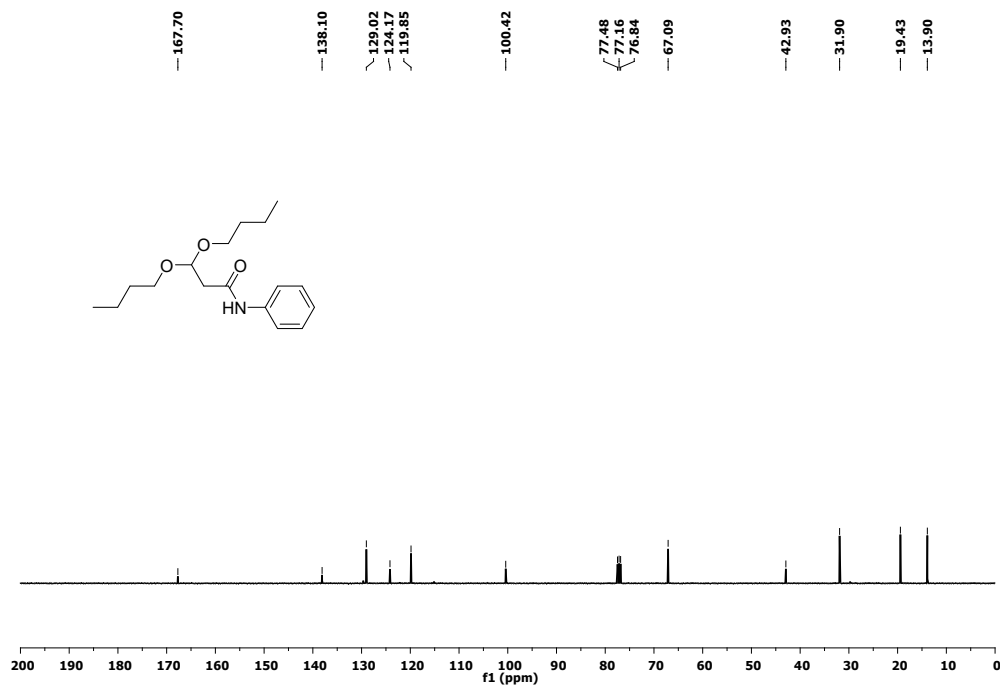

Fig. S52. <sup>13</sup>C NMR spectrum of 3,3-dibutoxy-N-phenylpropanamide (4ae)

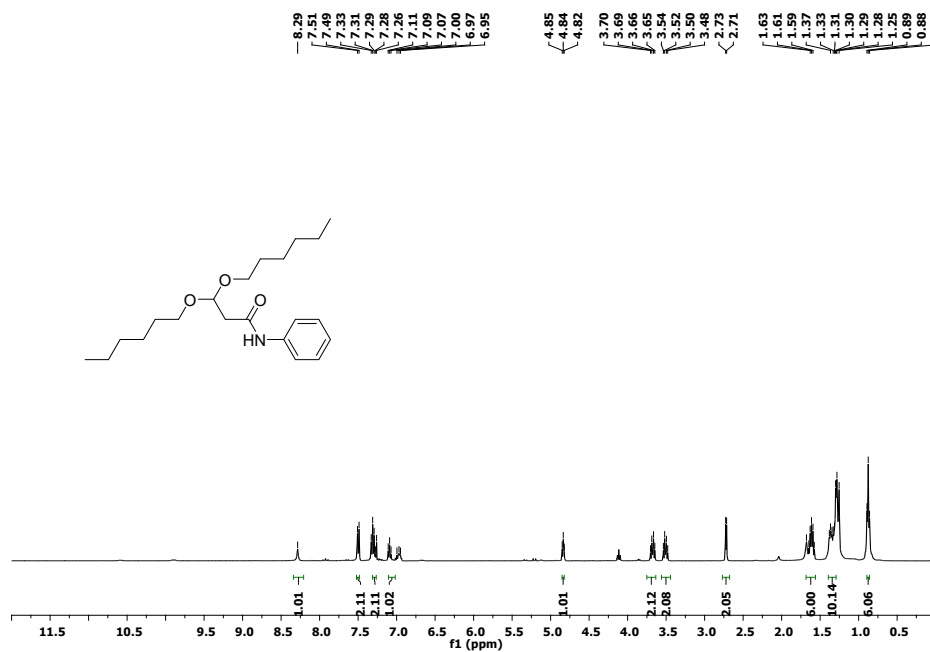

Fig. S53. <sup>1</sup>H NMR spectrum of 3,3-bis(hexyloxy)-N-phenylpropanamide (4af)

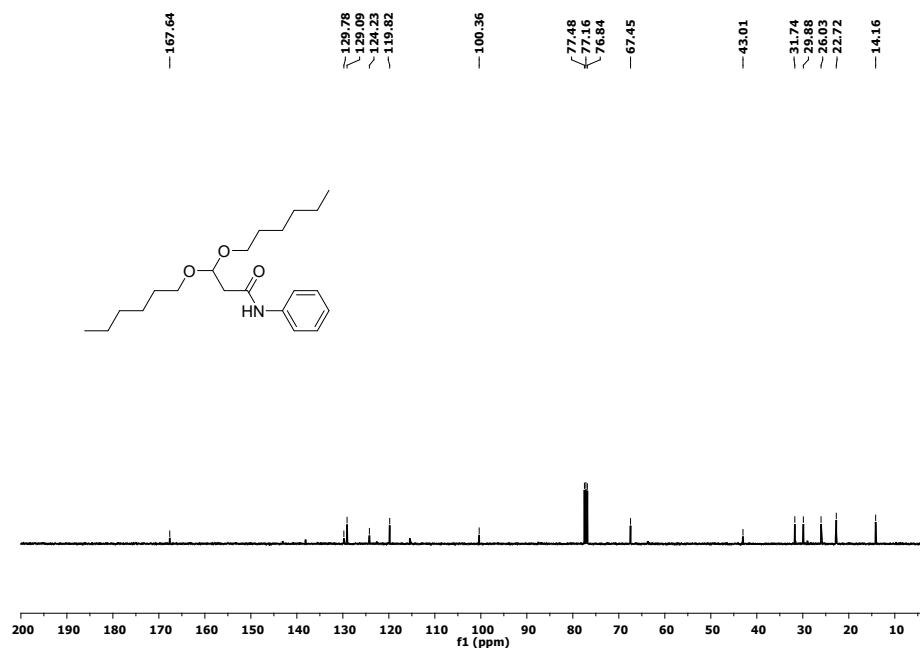

Fig. S54. <sup>13</sup>C NMR spectrum of 3,3-bis(hexyloxy)-N-phenylpropanamide (4af)

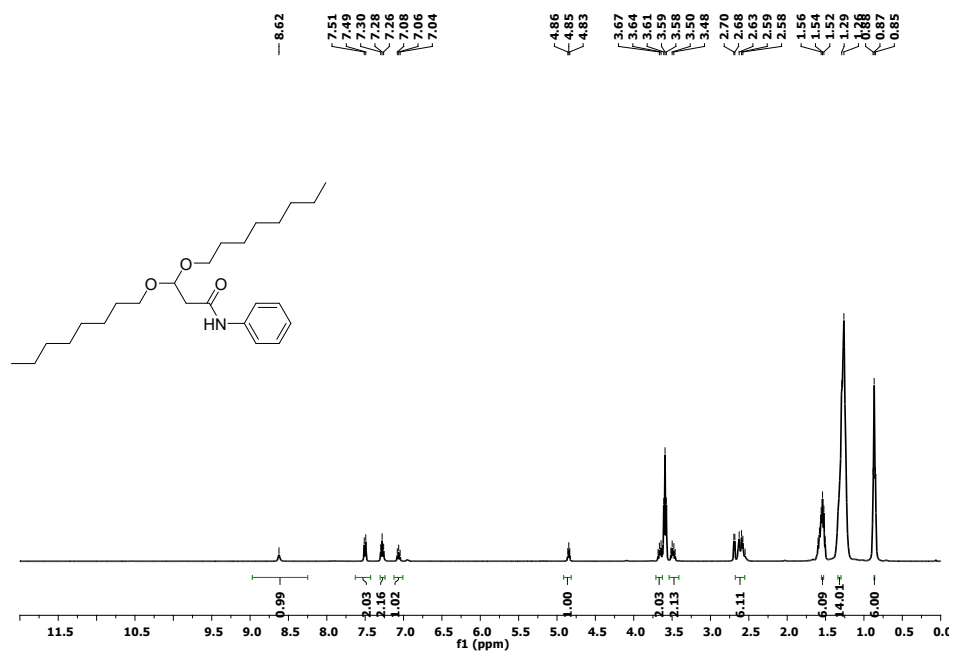

Fig. S55. <sup>1</sup>H NMR spectrum of 3,3-bis(octyloxy)-N-phenylpropanamide (4ag)

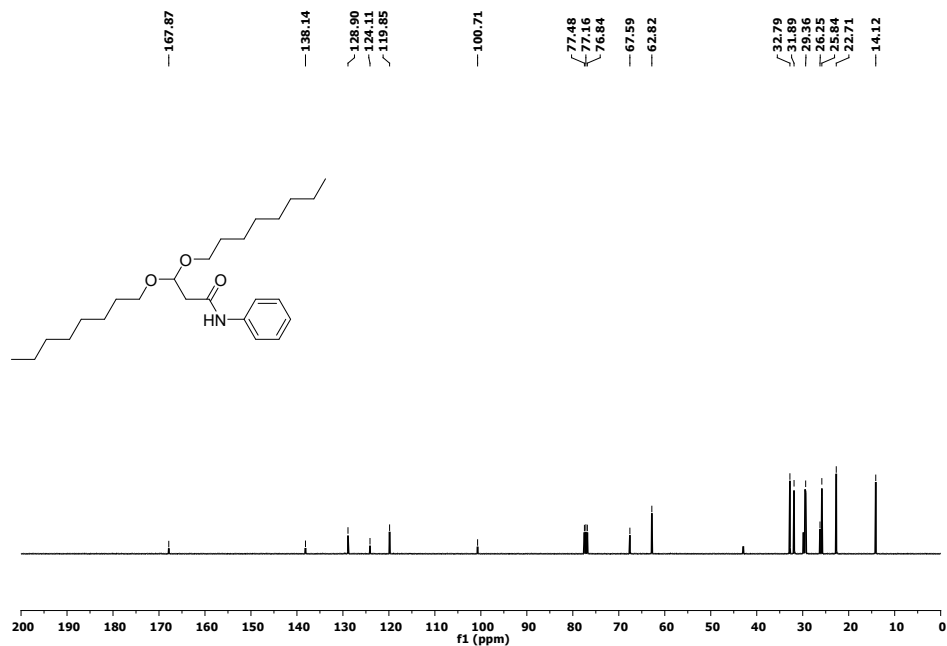

Fig. S56.  $^{13}\text{C}$  NMR spectrum of 3,3-bis(octyloxy)-N-phenylpropanamide (**4ag**)

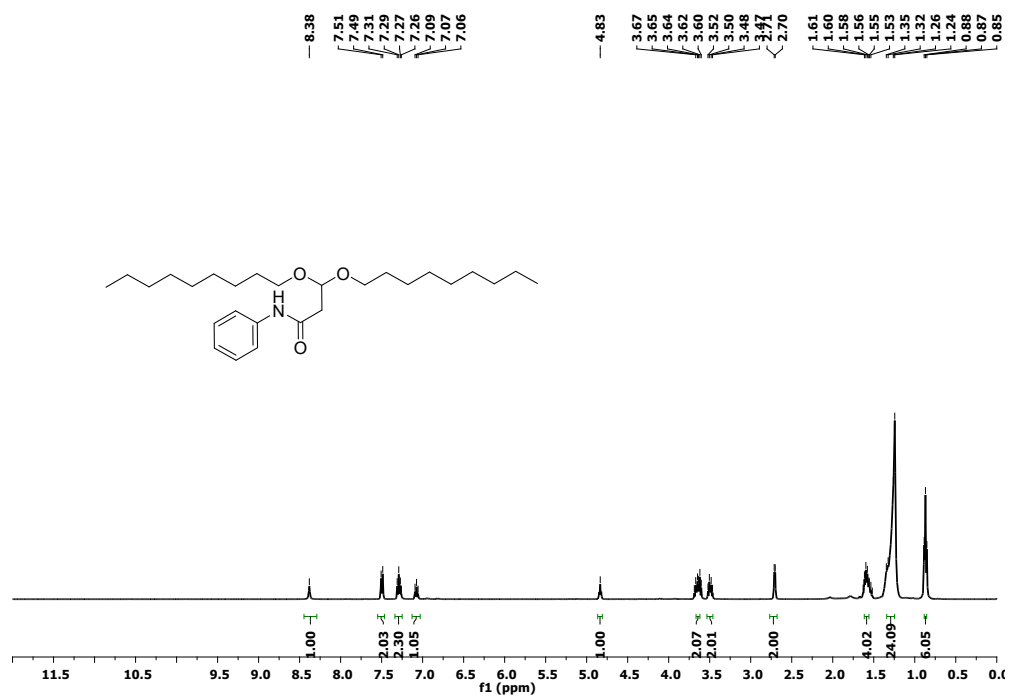

Fig. S57.  $^1\text{H}$  NMR spectrum of 3,3-bis(nonyloxy)-N-phenylpropanamide (**4ah**)



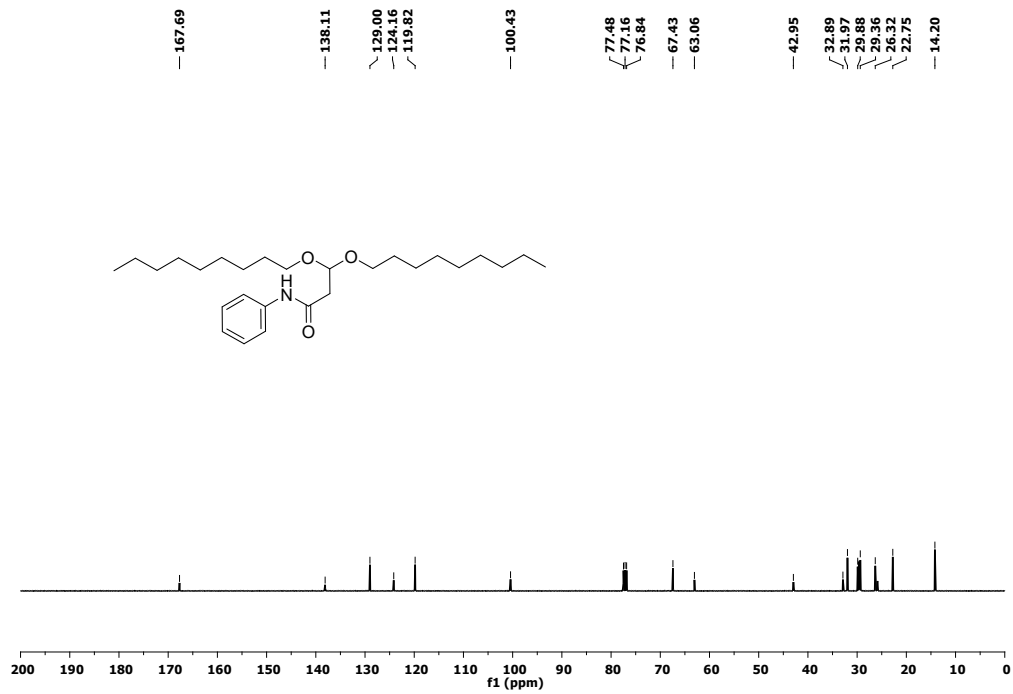

Fig. S58. <sup>13</sup>C NMR spectrum of 3,3-bis(nonyloxy)-N-phenylpropanamide (4ah)

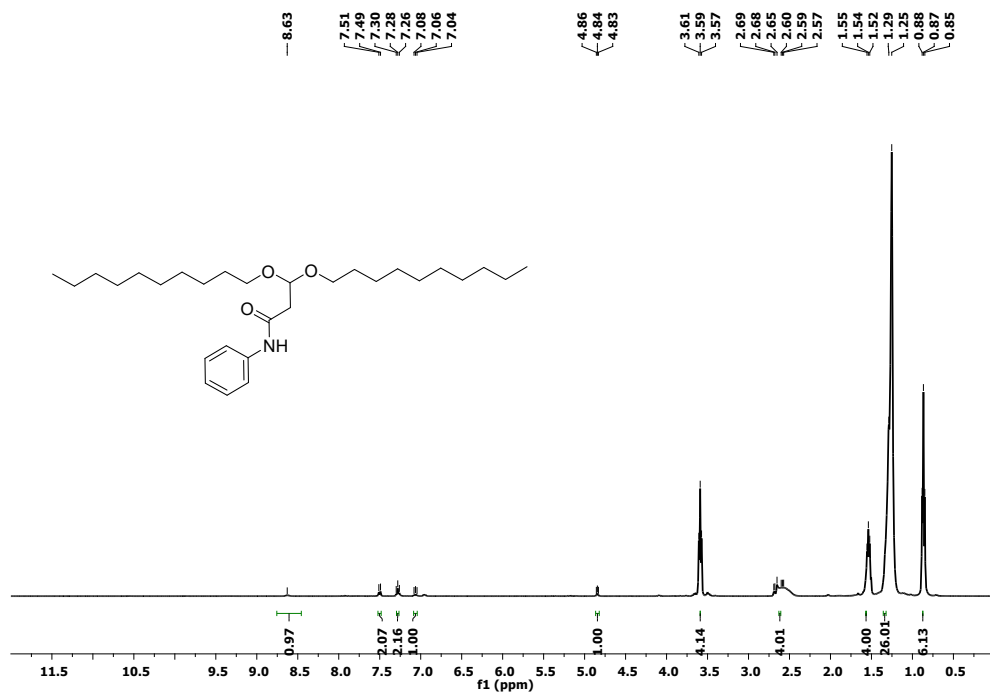

Fig. S59. <sup>1</sup>H NMR spectrum of 3,3-bis(decyloxy)-N-phenylpropanamide (4ai)

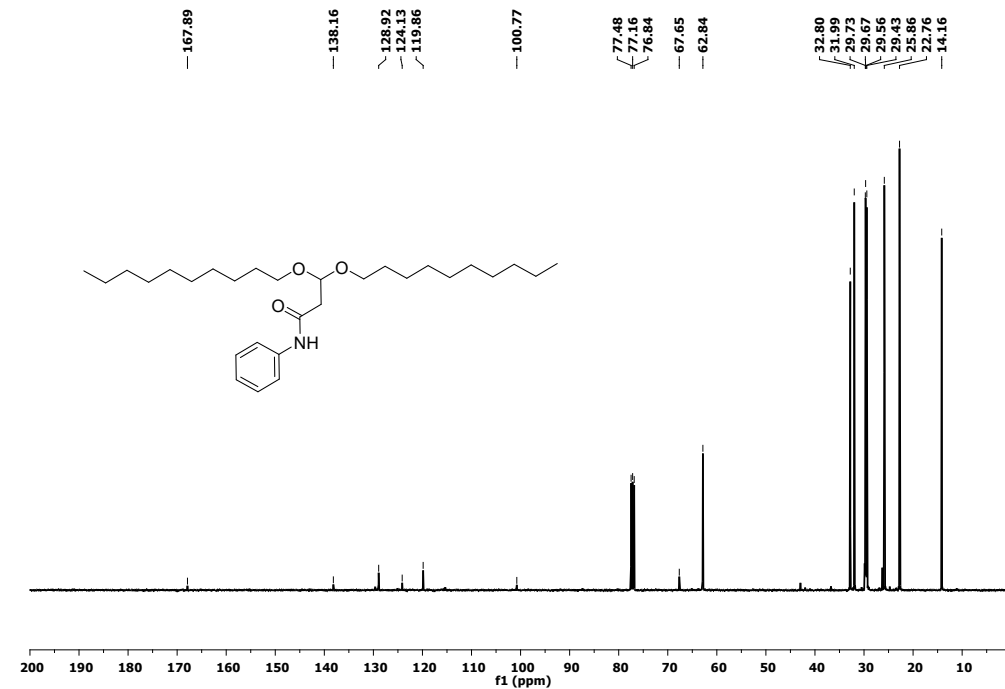

Fig. S60.  $^{13}\text{C}$  NMR spectrum of 3,3-bis(decyloxy)-N-phenylpropanamide (4ai)

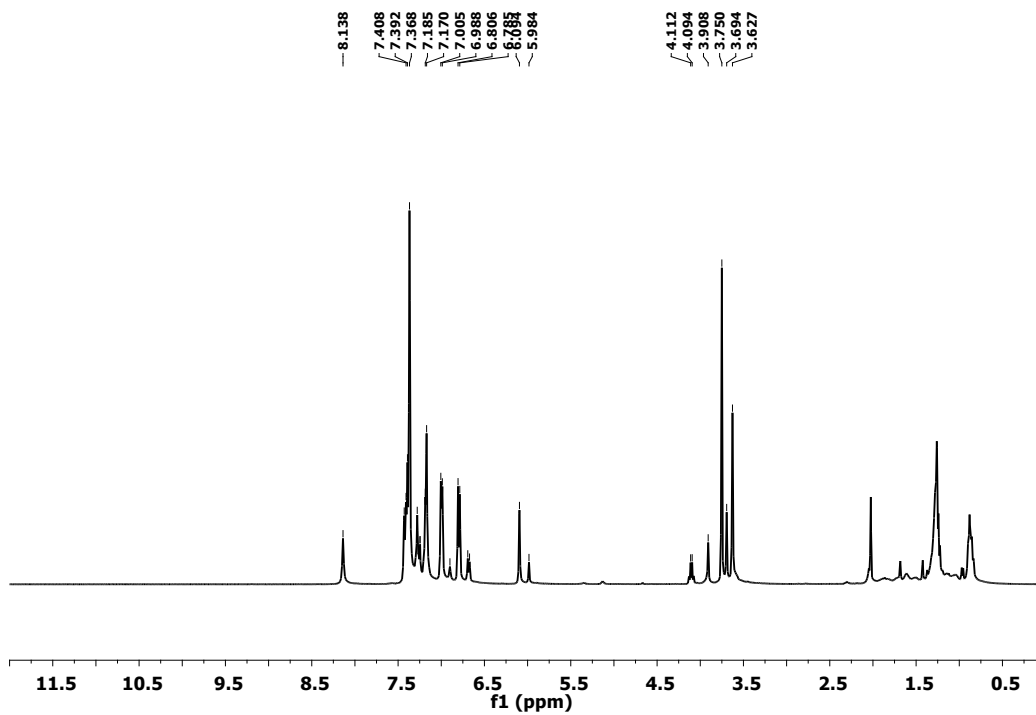

Figure S61.  $^1\text{H}$  NMR spectrum for the mixture of benzyl (styryl)sulfane and disulfide.

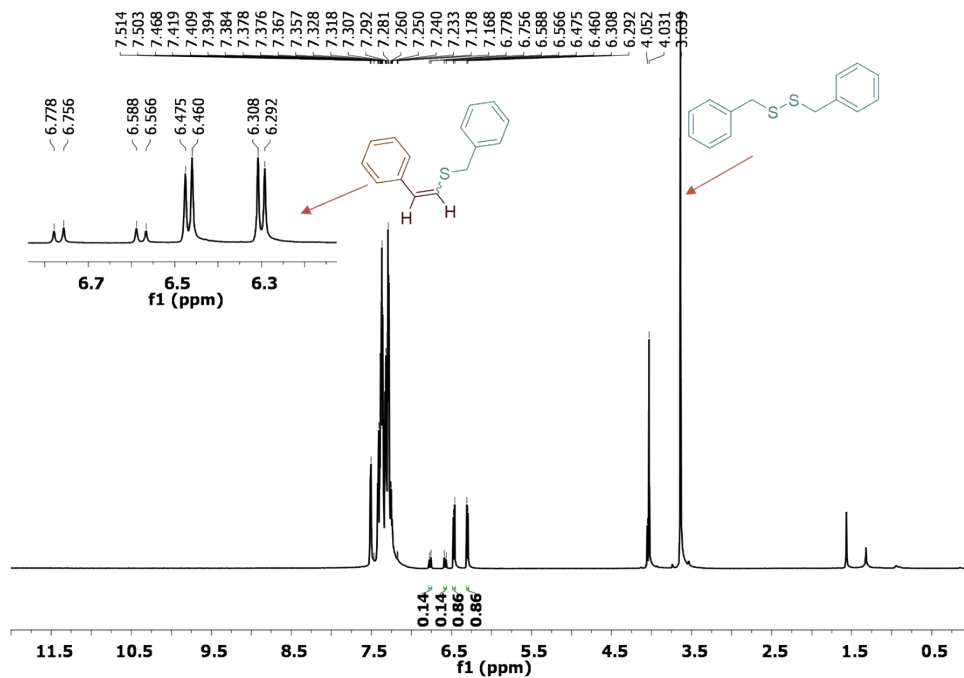

**Figure S62.**  $^1\text{H}$  NMR spectrum for the mixture of benzyl (styryl)sulfane and disulfide.

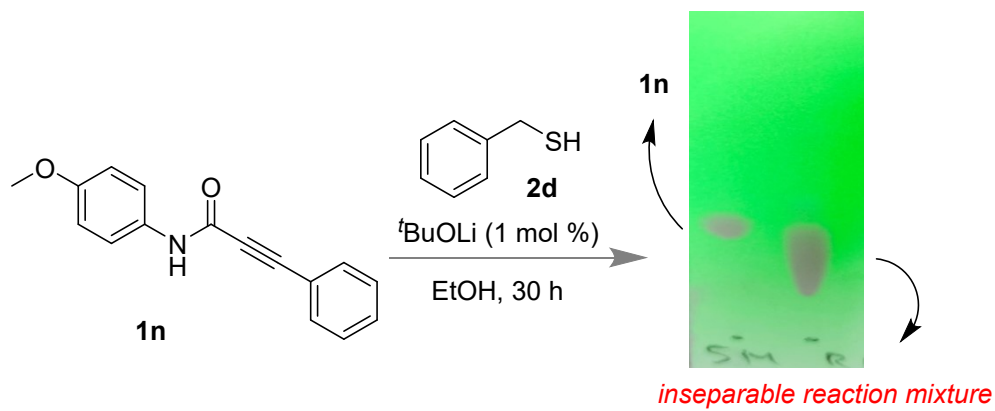

**Scheme S1.** Reaction of internal alkyne **1n** and benzyl mercaptan **2d** shows complex reaction mixture.
